# Supplementary material for: Host Transcriptional Response of Sclerotinia sclerotiorum Induced by the Mycoparasite Coniothyrium minitans
Source: Front Microbiol. 2020 Feb 11;11:183. doi: 10.3389/fmicb.2020.00183 (PMC7026392; doi:10.3389/fmicb.2020.00183)
Supplement: TABLE S5 — The secretory proteins in S. sclerotiroum and the related DEGs in S. sclerotiorum induced by C. minitans. [file Table_5.XLSX]

## Sheet: Sheet2
Table S5 The secretory proteins in S. sclerotiroum and the related DEGs in S. sclerotiorum induced by C. minitans
gene ID	gene Length	SignalP1	TargetP2	TMHMM3	PredGPI(Y)/KoGPI(N)4	Effector5	SsCm0h6	SsCm4h	SsCm12h	SsCm0h-RPKM7	SsCm4h-RPKM	SsCm12h-RPKM	log2RPKM(SsCm4h/SsCm0h)8	log2RPKM(SsCm12h/SsCm0h)	log2RPKM(SsCm12h/SsCm4h)	Nr annotation
SS1G_12778	75	Y	S	0	Y/N	Y	18	--	44	17.1283	0.001	49.2587	N/A	1.524	N/A	hypothetical protein SS1G_12778
SS1G_08163	87	Y	S	0	Y/N	Y	43	12	6	29.3607	9.53933	4.81991	-1.62193	-2.60681	N/A	hypothetical protein SS1G_08163
SS1G_03611	119	Y	S	0	Y/N	Y	515	277	984	96.4387	60.3897	216.785	N/A	N/A	1.84389	predicted protein
SS1G_11703	129	Y	S	0	Y/N	Y	29	--	78	19.9537	0.001	63.1408	N/A	1.66192	N/A	hypothetical protein SS1G_11703
SS1G_11673	129	Y	S	0	Y/N	Y	--	13	48	0.001	8.02642	29.9482	N/A	N/A	1.89964	predicted protein
SS1G_08706	134	Y	S	0	Y/N	Y	2002	500	241	1326.48	385.695	187.863	-1.78207	-2.81984	N/A	hypothetical protein SS1G_08706
SS1G_08834	138	Y	S	0	Y/N	Y	21	0	--	6.52222	0.001	0.001	-12.6711	N/A	N/A	predicted protein
SS1G_00735	143	Y	S	0	Y/N	Y	6061	1025	623	3395.46	668.525	410.613	-2.34456	-3.04776	N/A	predicted protein
SS1G_00849	152	Y	S	0	Y/N	Y	2199	922	267	1152.51	562.587	164.635	N/A	-2.80744	-1.77281	hypothetical protein SS1G_00849
SS1G_09882	156	Y	S	0	Y/N	Y	34	--	99	17.4783	0.001	59.8749	N/A	1.77639	N/A	hypothetical protein SS1G_09882
SS1G_07027	174	Y	S	0	Y/N	Y	1465	--	334	553.693	0.001	148.514	N/A	-1.89849	N/A	hypothetical protein SS1G_07027
SS1G_13035	180	Y	S	0	Y/N	Y	74	3	10	29.996	1.41577	4.76894	-4.40511	-2.65303	N/A	predicted protein
SS1G_04382	204	Y	S	0	Y/N	Y	210	--	53	84.6126	0.001	25.1236	N/A	-1.75183	N/A	predicted protein
SS1G_00744	211	Y	S	0	Y/N	Y	471	137	140	198.726	67.2965	69.4945	-1.56217	-1.51581	N/A	predicted protein
SS1G_08566	221	Y	S	0	Y/N	Y	316	29	22	127.322	13.6036	10.4287	-3.22642	-3.60986	N/A	hypothetical protein SS1G_08566
SS1G_07780	223	Y	S	0	Y/N	Y	11	146	98	4.39252	67.8754	46.0401	3.94977	3.38977	N/A	hypothetical protein SS1G_07780
SS1G_09982	226	Y	S	0	Y/N	Y	16	0	--	5.33352	0.001	0.001	-12.3809	N/A	N/A	predicted protein
SS1G_04519	230	Y	S	0	Y/N	Y	3381	--	641	1131.26	0.001	252.327	N/A	-2.16456	N/A	predicted protein
SS1G_07928	231	Y	S	0	Y/N	Y	27	--	77	7.31844	0.001	24.5547	N/A	1.74639	N/A	hypothetical protein SS1G_07928
SS1G_11912	245	Y	S	0	Y/N	Y	53	93	1352	16.5953	33.9025	498.053	N/A	4.90745	3.87684	SsNEP2
SS1G_08595	245	Y	S	0	Y/N	Y	--	26	75	0.001	7.24597	21.122	N/A	N/A	1.5435	hypothetical protein SS1G_08595
SS1G_12907	246	Y	S	0	Y/N	Y	--	26	111	0.001	8.30546	35.8314	N/A	N/A	2.10909	hypothetical protein SS1G_12907
SS1G_07836	252	Y	S	0	Y/N	Y	3417	663	--	1208.07	272.898	0.001	-2.14627	N/A	N/A	hypothetical protein SS1G_07836
SS1G_05037	272	Y	S	0	Y/N	Y	411	83	--	134.663	31.6609	0.001	-2.08858	N/A	N/A	hypothetical protein SS1G_05037
SS1G_01389	273	Y	S	0	Y/N	Y	94	44	12	30.6864	16.7228	4.60881	N/A	-2.73513	-1.85935	hypothetical protein SS1G_01389
SS1G_12287	277	Y	S	0	Y/N	Y	48	34	130	12.6155	10.4036	40.1973	N/A	1.6719	1.95002	predicted protein
SS1G_07404	282	Y	S	0	Y/N	Y	54	9	16	11.0446	2.14308	3.85005	-2.36559	-1.52039	N/A	SsRsh1
SS1G_01754	282	Y	S	0	Y/N	Y	97	374	--	11.4869	51.5633	0.001	2.16636	N/A	N/A	hypothetical protein SS1G_01754
SS1G_04095	282	Y	S	0	Y/N	Y	52	320	251	15.4527	110.711	87.7538	2.84086	2.5056	N/A	hypothetical protein SS1G_04095
SS1G_09782	287	Y	S	0	Y/N	Y	9	4	58	1.66673	0.862424	12.6369	N/A	2.92255	3.8731	hypothetical protein SS1G_09782
SS1G_05073	290	Y	S	0	Y/N	Y	19	39	196	4.55225	10.8787	55.2482	N/A	3.60128	2.34443	hypothetical protein SS1G_05073
SS1G_02553	290	Y	S	0	Y/N	Y	--	4	33	0.001	0.813046	6.77829	N/A	N/A	3.05951	hypothetical protein SS1G_02553
SS1G_00872	231	Y	S	0	N/Y	N	19	813	635	5.88064	292.955	231.225	5.63856	5.29718	N/A	predicted protein
SS1G_02828	204	Y	S	0	-/Y	N	426	--	1542	147.122	0.001	626.532	N/A	2.09037	N/A	predicted protein
SS1G_07295	223	Y	S	0	-/Y	N	23	11	88	8.56018	4.76636	38.5325	N/A	2.17036	3.01512	hypothetical protein SS1G_07295
SS1G_12291	224	Y	S	0	-/Y	N	168	28	175	66.7876	12.9594	81.8491	-2.36559	N/A	2.65897	hypothetical protein SS1G_12291
SS1G_00474	239	Y	S	0	-/Y	N	249	--	605	62.2716	0.001	178.006	N/A	1.51528	N/A	hypothetical protein SS1G_00474
SS1G_14307	244	Y	S	0	-/Y	N	53	--	143	16.7517	0.001	53.1751	N/A	1.66644	N/A	predicted protein
SS1G_07723	250	Y	S	0	-/Y	N	56	201	--	16.809	70.2405	0.001	2.06307	N/A	N/A	predicted protein
SS1G_11413	254	Y	S	0	-/Y	N	--	1003	243	0.001	409.608	100.282	N/A	N/A	-2.03018	hypothetical protein SS1G_11413
SS1G_03885	275	Y	S	0	-/Y	N	29	2	--	7.56998	0.607807	0.001	-3.6386	N/A	N/A	hypothetical protein SS1G_03885
SS1G_10178	296	Y	S	0	-/Y	N	16	47	--	4.27213	14.6104	0.001	1.77397	N/A	N/A	hypothetical protein SS1G_10178
SS1G_09248	94	Y	S	0	Y/Y	N	11	9	55	8.38572	7.98783	49.3287	N/A	2.55642	2.62655	predicted protein
SS1G_04393	129	Y	S	0	Y/Y	N	51	159	259	20.0373	72.7286	119.718	1.85983	2.57888	N/A	predicted protein
SS1G_09270	173	Y	S	0	Y/Y	N	380	934	1876	195.345	558.992	1134.6	1.5168	2.53808	N/A	hypothetical protein SS1G_09270
SS1G_07183	192	Y	S	0	Y/Y	N	102	--	248	32.6233	0.001	93.3189	N/A	1.51626	N/A	hypothetical protein SS1G_07183
SS1G_07661	202	Y	S	0	Y/Y	N	22	--	85	7.79861	0.001	35.4489	N/A	2.18445	N/A	hypothetical protein SS1G_07661
SS1G_09844	208	Y	S	0	Y/Y	N	2	18	--	0.792741	8.3064	0.001	3.3893	N/A	N/A	predicted protein
SS1G_14133	302	Y	S	0	Y/N	N	10186	--	30167	2643.46	0.001	9210.67	N/A	1.80088	N/A	hypothetical protein SS1G_14133
SS1G_00044	362	Y	S	0	Y/N	N	27	39	246	4.73856	7.96867	50.7934	N/A	3.42212	2.67223	hypothetical protein SS1G_00044
SS1G_00423	677	Y	S	0	Y/N	N	309	212	890	38.783	30.9783	131.42	N/A	1.76069	2.08486	hypothetical protein SS1G_00423
SS1G_00505	718	Y	S	0	Y/N	N	--	32	106	0.001	3.8436	12.8661	N/A	N/A	1.74304	hypothetical protein SS1G_00505
SS1G_00513	312	Y	S	0	Y/N	N	2146	--	468	362.863	0.001	93.0998	N/A	-1.96258	N/A	hypothetical protein SS1G_00513
SS1G_00772	575	Y	S	0	Y/N	N	223	801	--	27.3995	114.58	0.001	2.06413	N/A	N/A	hypothetical protein SS1G_00772
SS1G_00773	1708	Y	S	0	Y/N	N	362	933	299	16.6194	49.8685	16.1498	1.58526	N/A	-1.62661	hypothetical protein SS1G_00773
SS1G_00861	303	Y	S	0	Y/N	N	6	28	--	1.14922	6.2438	0.001	2.44177	N/A	N/A	hypothetical protein SS1G_00861
SS1G_00877	544	Y	S	0	Y/N	N	--	11	39	0.001	2.10186	7.53055	N/A	N/A	1.84109	hypothetical protein SS1G_00877
SS1G_00892	421	Y	S	0	Y/N	N	6	--	30	0.98716	0.001	5.80694	N/A	2.55642	N/A	hypothetical protein SS1G_00892
SS1G_00974	580	Y	S	0	Y/N	N	17	--	45	2.40603	0.001	7.49297	N/A	1.63888	N/A	hypothetical protein SS1G_00974
SS1G_01081	714	Y	S	0	Y/N	N	81	386	359	9.24927	51.3155	48.2288	2.47198	2.38248	N/A	hypothetical protein SS1G_01081
SS1G_01083	998	Y	S	0	Y/N	N	324	80	--	29.01	8.33935	0.001	-1.79855	N/A	N/A	hypothetical protein SS1G_01083
SS1G_01384	541	Y	S	0	Y/N	N	7	--	30	1.08956	0.001	5.49369	N/A	2.33403	N/A	hypothetical protein SS1G_01384
SS1G_01472	583	Y	S	0	Y/N	N	26	3	--	3.4369	0.461694	0.001	-2.8961	N/A	N/A	hypothetical protein SS1G_01472
SS1G_01576	602	Y	S	0	Y/N	N	15	41	201	1.56134	4.96855	24.6146	1.67004	3.97865	2.30862	hypothetical protein SS1G_01576
SS1G_01811	475	Y	S	0	Y/N	N	87	--	225	9.46325	0.001	28.7934	N/A	1.60533	N/A	hypothetical protein SS1G_01811
SS1G_01828	328	Y	S	0	Y/N	N	22	--	53	5.11129	0.001	14.4868	N/A	1.50298	N/A	hypothetical protein SS1G_01828
SS1G_02005	515	Y	S	0	Y/N	N	9	33	51	0.999208	4.26546	6.66152	2.09385	2.73699	N/A	hypothetical protein SS1G_02005
SS1G_02022	846	Y	S	0	Y/N	N	50	77	281	4.55127	8.16004	30.0925	N/A	2.72506	1.88276	hypothetical protein SS1G_02022
SS1G_02247	372	Y	S	0	Y/N	N	200	39	41	47.9612	10.8884	11.5673	-2.13908	-2.05181	N/A	predicted protein
SS1G_02334	504	Y	S	0	Y/N	N	--	26	84	0.001	4.87559	15.9178	N/A	N/A	1.707	hypothetical protein SS1G_02334
SS1G_02612	539	Y	S	0	Y/N	N	346	67	195	50.5701	11.4007	33.5306	-2.14916	N/A	1.55636	hypothetical protein SS1G_02612
SS1G_02620	483	Y	S	0	Y/N	N	21	62	--	2.82042	9.69449	0.001	1.78126	N/A	N/A	hypothetical protein SS1G_02620
SS1G_02692	822	Y	S	0	Y/N	N	15	0	--	1.55832	0.001	0.001	-10.6058	N/A	N/A	predicted protein
SS1G_02708	305	Y	S	0	Y/N	N	41	--	10	10.4582	0.001	3.00099	N/A	-1.80113	N/A	hypothetical protein SS1G_02708
SS1G_02781	1008	Y	S	0	Y/N	N	75	--	198	6.53645	0.001	20.3018	N/A	1.63503	N/A	hypothetical protein SS1G_02781
SS1G_02790	527	Y	S	0	Y/N	N	200	246	781	31.5327	45.1549	144.868	N/A	2.19982	1.68178	hypothetical protein SS1G_02790
SS1G_02812	600	Y	S	0	Y/N	N	73	10	18	9.36378	1.49337	2.71638	-2.64852	-1.78541	N/A	predicted protein
SS1G_03138	718	Y	S	0	Y/N	N	94	--	240	11.0149	0.001	33.0869	N/A	1.5868	N/A	hypothetical protein SS1G_03138
SS1G_03214	527	Y	S	0	Y/N	N	10	60	36	1.69408	11.8338	7.17509	2.80434	2.08249	N/A	predicted protein
SS1G_03286	344	Y	S	0	Y/N	N	116	512	157	24.1863	124.285	38.5124	2.3614	N/A	-1.69026	hypothetical protein SS1G_03286
SS1G_03687	373	Y	S	0	Y/N	N	68	--	188	11.7877	0.001	38.3413	N/A	1.70162	N/A	hypothetical protein SS1G_03687
SS1G_03795	339	Y	S	0	Y/N	N	53	--	232	11.9014	0.001	61.2914	N/A	2.36455	N/A	hypothetical protein SS1G_03795
SS1G_03941	553	Y	S	0	Y/N	N	29	127	220	4.1044	20.9264	36.6323	2.35008	3.15787	N/A	hypothetical protein SS1G_03941
SS1G_04030	538	Y	S	0	Y/N	N	299	199	1567	41.8324	32.4141	257.929	N/A	2.62428	2.99228	lysophospholipase
SS1G_04085	304	Y	S	0	Y/N	N	740	--	2331	198.177	0.001	734.437	N/A	1.88985	N/A	hypothetical protein SS1G_04085
SS1G_04152	516	Y	S	0	Y/N	N	--	32	94	0.001	5.63859	16.7378	N/A	N/A	1.56971	hypothetical protein SS1G_04152
SS1G_04200	774	Y	S	0	Y/N	N	61	131	872	6.51629	16.2922	109.591	N/A	4.07194	2.74988	hypothetical protein SS1G_04200
SS1G_04468	526	Y	S	0	Y/N	N	48	29	183	6.03018	4.24156	27.0477	N/A	2.16523	2.67284	hypothetical protein SS1G_04468
SS1G_04592	341	Y	S	0	Y/N	N	--	51	147	0.001	13.4456	39.1633	N/A	N/A	1.54236	hypothetical protein SS1G_04592
SS1G_05049	482	Y	S	0	Y/N	N	1305	379	--	233.303	78.8837	0.001	-1.5644	N/A	N/A	hypothetical protein SS1G_05049
SS1G_05192	891	Y	S	0	Y/N	N	419	44	91	33.2159	4.06091	8.48716	-3.032	-1.96852	N/A	hypothetical protein SS1G_05192
SS1G_05210	398	Y	S	0	Y/N	N	36	21	90	6.39758	4.34482	18.8168	N/A	1.55642	2.11465	hypothetical protein SS1G_05210
SS1G_05273	529	Y	S	0	Y/N	N	63	167	--	7.9369	24.4943	0.001	1.6258	N/A	N/A	hypothetical protein SS1G_05273
SS1G_05434	408	Y	S	0	Y/N	N	8	14	42	1.47441	3.00397	9.10684	N/A	2.62681	1.60008	hypothetical protein SS1G_05434
SS1G_05454	1761	Y	S	0	Y/N	N	5	23	--	0.221808	1.18788	0.001	2.42101	N/A	N/A	hypothetical protein SS1G_05454
SS1G_05917	352	Y	S	0	Y/N	N	27	149	392	5.6781	36.4808	96.9874	2.68366	4.09432	N/A	hypothetical protein SS1G_05917
SS1G_06037	421	Y	S	0	Y/N	N	6	14	61	1.08494	2.94729	12.977	N/A	3.58027	2.1385	glucan 1,3-beta-glucosidase
SS1G_06942	527	Y	S	0	Y/N	N	259	--	68	39.9201	0.001	12.3308	N/A	-1.69485	N/A	predicted protein
SS1G_07224	342	Y	S	0	Y/N	N	53	--	7	13.8214	0.001	2.14764	N/A	-2.68607	N/A	predicted protein
SS1G_07571	358	Y	S	0	Y/N	N	--	4	24	0.001	0.790919	4.7955	N/A	N/A	2.60008	predicted protein
SS1G_07639	393	Y	S	0	Y/N	N	213	144	5202	40.3082	31.726	1158.17	N/A	4.84463	5.19004	hypothetical protein SS1G_07639
SS1G_07655	587	Y	S	0	Y/N	N	1505	--	3673	190.498	0.001	546.972	N/A	1.52169	N/A	hypothetical protein SS1G_07655
SS1G_07656	346	Y	S	0	Y/N	N	24	3	--	3.90791	0.568713	0.001	-2.78062	N/A	N/A	hypothetical protein SS1G_07656
SS1G_07812	328	Y	S	0	Y/N	N	61	13	--	14.7734	3.66549	0.001	-2.01092	N/A	N/A	hypothetical protein SS1G_07812
SS1G_08634	437	Y	S	0	Y/N	N	17	--	42	2.87994	0.001	8.37093	N/A	1.53935	N/A	hypothetical protein SS1G_08634
SS1G_08645	482	Y	S	0	Y/N	N	596	--	1627	105.845	0.001	339.94	N/A	1.68332	N/A	hypothetical protein SS1G_08645
SS1G_08695	420	Y	S	0	Y/N	N	646	--	156	130.534	0.001	37.0857	N/A	-1.81549	N/A	hypothetical protein SS1G_08695
SS1G_08889	738	Y	S	0	Y/N	N	7	5	31	0.67278	0.559479	3.50531	N/A	2.38134	2.64739	hypothetical protein SS1G_08889
SS1G_09060	932	Y	S	0	Y/N	N	413	847	3398	38.8725	92.8144	376.276	N/A	3.27497	2.01937	hypothetical protein SS1G_09060
SS1G_09216	828	Y	S	0	Y/N	N	310	970	1449	31.005	112.948	170.501	1.86509	2.45921	N/A	hypothetical protein SS1G_09216
SS1G_09365	417	Y	S	0	Y/N	N	890	200	89	177.565	46.4555	20.8904	-1.93443	-3.08743	N/A	hypothetical protein SS1G_09365
SS1G_09866	422	Y	S	0	Y/N	N	25	204	176	4.43395	42.1231	36.7243	3.24795	3.05007	N/A	hypothetical protein SS1G_09866
SS1G_09959	465	Y	S	0	Y/N	N	244	--	945	44.9079	0.001	204.623	N/A	2.18793	N/A	hypothetical protein SS1G_09959
SS1G_09965	632	Y	S	0	Y/N	N	1370	--	3617	172.84	0.001	536.86	N/A	1.63511	N/A	hypothetical protein SS1G_09965
SS1G_10165	327	Y	S	0	Y/N	N	6	46	36	1.53925	13.739	10.8655	3.15798	2.81946	N/A	hypothetical protein SS1G_10165
SS1G_10172	419	Y	S	0	Y/N	N	--	215	1016	0.001	42.0857	200.974	N/A	N/A	2.25561	hypothetical protein SS1G_10172
SS1G_10266	434	Y	S	0	Y/N	N	36	3	--	3.51925	0.341435	0.001	-3.36559	N/A	N/A	predicted protein
SS1G_10746	359	Y	S	0	Y/N	N	--	30	96	0.001	7.98329	25.8156	N/A	N/A	1.69319	hypothetical protein SS1G_10746
SS1G_10796	504	Y	S	0	Y/N	N	1783	131	76	287.361	24.5802	14.4105	-3.54729	-4.31767	N/A	hypothetical protein SS1G_10796
SS1G_10940	577	Y	S	0	Y/N	N	158	39	--	19.6561	5.64863	0.001	-1.799	N/A	N/A	hypothetical protein SS1G_10940
SS1G_11120	359	Y	S	0	Y/N	N	39	103	--	8.839	27.1778	0.001	1.62047	N/A	N/A	predicted protein
SS1G_11202	669	Y	S	0	Y/N	N	--	75	228	0.001	8.48641	26.0704	N/A	N/A	1.61919	predicted protein
SS1G_11239	631	Y	S	0	Y/N	N	803	2728	3117	107.417	424.857	490.553	1.98375	2.19118	N/A	hypothetical protein SS1G_11239
SS1G_11412	370	Y	S	0	Y/N	N	61	47	14	13.9191	12.4859	3.75838	N/A	-1.88889	-1.73212	hypothetical protein SS1G_11412
SS1G_11551	488	Y	S	0	Y/N	N	1141	--	221	132.89	0.001	30.2824	N/A	-2.13369	N/A	predicted protein
SS1G_11927	652	Y	S	0	Y/N	N	--	71	19	0.001	10.6692	2.88522	N/A	N/A	-1.8867	hypothetical protein SS1G_11927
SS1G_11988	678	Y	S	0	Y/N	N	3008	770	383	386.208	115.099	57.8539	-1.7465	-2.73889	N/A	hypothetical protein SS1G_11988
SS1G_12057	452	Y	S	0	Y/N	N	16	88	69	3.1593	20.2298	16.0291	2.67881	2.34302	N/A	hypothetical protein SS1G_12057
SS1G_12198	611	Y	S	0	Y/N	N	36	3	1	4.95656	0.480882	0.161982	-3.36559	-4.93543	N/A	hypothetical protein SS1G_12198
SS1G_12210	626	Y	S	0	Y/N	N	--	150	464	0.001	18.1847	56.8438	N/A	N/A	1.64428	hypothetical protein SS1G_12210
SS1G_12383	478	Y	S	0	Y/N	N	11	39	176	1.98773	8.20478	37.4167	2.04535	4.23449	2.18915	hypothetical protein SS1G_12383
SS1G_12413	475	Y	S	0	Y/N	N	186	270	841	31.3713	53.0179	166.881	N/A	2.4113	1.65426	hypothetical protein SS1G_12413
SS1G_12513	363	Y	S	0	Y/N	N	63	--	290	10.302	0.001	55.7917	N/A	2.43712	N/A	hypothetical protein SS1G_12513
SS1G_12938	554	Y	S	0	Y/N	N	1853	--	5395	248.744	0.001	852.037	N/A	1.77625	N/A	hypothetical protein SS1G_12938
SS1G_13036	723	Y	S	0	Y/N	N	224	18	16	26.3635	2.46642	2.21547	-3.41805	-3.57286	N/A	hypothetical protein SS1G_13036
SS1G_13199	412	Y	S	0	Y/N	N	31	123	113	4.86754	22.485	20.8745	2.20769	2.10048	N/A	hypothetical protein SS1G_13199
SS1G_13277	345	Y	S	0	Y/N	N	110	15	10	28.4371	4.51464	3.04146	-2.65509	-3.22494	N/A	hypothetical protein SS1G_13277
SS1G_13732	527	Y	S	0	Y/N	N	1473	376	90	249.539	74.1586	17.9377	-1.75058	-3.79819	-2.04762	hypothetical protein SS1G_13732
SS1G_13777	343	Y	S	0	Y/N	N	102	64	649	16.4095	11.9871	122.837	N/A	2.90414	3.35719	hypothetical protein SS1G_13777
SS1G_13872	331	Y	S	0	Y/N	N	2	80	111	0.401711	18.7074	26.2299	5.5413	6.02891	N/A	hypothetical protein SS1G_13872
SS1G_14032	309	Y	S	0	Y/N	N	35	97	165	9.35458	30.1833	51.8836	1.69001	2.47153	N/A	hypothetical protein SS1G_14032
SS1G_14127	494	Y	S	0	Y/N	N	--	633	1780	0.001	106.896	303.758	N/A	N/A	1.50672	hypothetical protein SS1G_14127
SS1G_14407	694	Y	S	0	Y/N	N	65	--	13	5.62292	0.001	1.32307	N/A	-2.08743	N/A	hypothetical protein SS1G_14407
SS1G_14408	391	Y	S	0	Y/N	N	43	--	3	9.81186	0.001	0.805367	N/A	-3.60681	N/A	predicted protein
SS1G_05794	332	Y	S	0	--	N	12222	2095	1123	3282.97	655.16	354.89	-2.32508	-3.20956	N/A	hypothetical protein SS1G_05794
SS1G_08548	356	Y	S	0	--	N	14	38	--	3.28967	10.3955	0.001	1.65995	N/A	N/A	hypothetical protein SS1G_08548
SS1G_10707	381	Y	S	0	--	N	62	6	4	12.6519	1.42546	0.960316	-3.14986	-3.7197	N/A	hypothetical protein SS1G_10707
SS1G_10867	405	Y	S	0	--	N	278	--	78	55.2179	0.001	18.2272	N/A	-1.59905	N/A	hypothetical protein SS1G_10867
SS1G_08229	444	Y	S	0	--	N	2	131	244	0.260654	19.8767	37.4122	6.2528	7.16523	N/A	hypothetical protein SS1G_08229
SS1G_02501	449	Y	S	0	--	N	180	--	433	33.2657	0.001	94.1458	N/A	1.50086	N/A	hypothetical protein SS1G_02501
SS1G_06333	509	Y	S	0	--	N	68	102	482	10.7211	18.7227	89.4061	N/A	3.05992	2.25558	hypothetical protein SS1G_06333
SS1G_13385	519	Y	S	0	--	N	56	8	11	9.28178	1.54373	2.14499	-2.58798	-2.11343	N/A	hypothetical protein SS1G_13385
SS1G_07667	524	Y	S	0	--	N	2612	787	3228	362.979	127.327	527.753	-1.51134	N/A	2.05132	predicted protein
SS1G_13736	525	Y	S	0	--	N	--	4	25	0.001	0.791921	5.00164	N/A	N/A	2.65897	hypothetical protein SS1G_13736
SS1G_04662	536	Y	S	0	--	N	98	--	425	15.8134	0.001	80.682	N/A	2.3511	N/A	hypothetical protein SS1G_04662
SS1G_11977	594	Y	S	0	--	N	7	5	27	0.887294	0.737867	4.02645	N/A	2.18203	2.44808	hypothetical protein SS1G_11977
SS1G_04530	648	Y	S	0	--	N	1751	1329	424	234.7	207.391	66.8623	N/A	-1.81155	-1.63309	hypothetical protein SS1G_04530
SS1G_04473	761	Y	S	0	--	N	118	389	426	11.4519	43.9525	48.6401	1.94036	2.08656	N/A	hypothetical protein SS1G_04473
SS1G_13682	771	Y	S	0	--	N	2	--	22	0.21597	0.001	2.79496	N/A	3.69393	N/A	predicted protein
SS1G_12083	1157	Y	S	0	--	N	27	14	87	1.78631	1.07835	6.77175	N/A	1.92255	2.65071	hypothetical protein SS1G_12083
SS1G_04213	1761	Y	S	0	--	N	653	1639	2042	32.5159	95.0167	119.626	1.54704	1.87932	N/A	hypothetical protein SS1G_04213
SS1G_05172	31	Y	S	0	--	Y?	--	--	--	--	--	--	--	--	--	predicted protein
SS1G_08160	33	Y	S	0	--	Y?	--	--	--	--	--	--	--	--	--	predicted protein
SS1G_12065	39	Y	S	0	--	Y?	--	--	--	--	--	--	--	--	--	predicted protein
SS1G_06539	43	Y	S	0	--	Y?	--	--	--	--	--	--	--	--	--	predicted protein
SS1G_13901	44	Y	S	0	--	Y?	--	--	--	--	--	--	--	--	--	predicted protein
SS1G_14246	46	Y	S	0	--	Y?	--	--	--	--	--	--	--	--	--	hypothetical protein SS1G_14246
SS1G_04370	47	Y	S	0	--	Y?	--	--	--	--	--	--	--	--	--	hypothetical protein SS1G_04370
SS1G_04971	47	Y	S	0	--	Y?	--	--	--	--	--	--	--	--	--	predicted protein
SS1G_09643	47	Y	S	0	--	Y?	--	--	--	--	--	--	--	--	--	hypothetical protein SS1G_09643
SS1G_03617	50	Y	S	0	--	Y?	--	--	--	--	--	--	--	--	--	predicted protein
SS1G_13323	50	Y	S	0	--	Y?	--	--	--	--	--	--	--	--	--	predicted protein
SS1G_01950	52	Y	S	0	--	Y?	--	--	--	--	--	--	--	--	--	predicted protein
SS1G_08088	52	Y	S	0	--	Y?	--	--	--	--	--	--	--	--	--	predicted protein
SS1G_11928	52	Y	S	0	--	Y?	--	--	--	--	--	--	--	--	--	predicted protein
SS1G_01325	53	Y	S	0	--	Y?	--	--	--	--	--	--	--	--	--	predicted protein
SS1G_09107	54	Y	S	0	--	Y?	--	--	--	--	--	--	--	--	--	predicted protein
SS1G_00205	55	Y	S	0	--	Y?	--	--	--	--	--	--	--	--	--	predicted protein
SS1G_06067	55	Y	S	0	--	Y?	--	--	--	--	--	--	--	--	--	predicted protein
SS1G_06238	55	Y	S	0	--	Y?	--	--	--	--	--	--	--	--	--	predicted protein
SS1G_09968	55	Y	S	0	--	Y?	--	--	--	--	--	--	--	--	--	predicted protein
SS1G_10442	57	Y	S	0	--	Y?	--	--	--	--	--	--	--	--	--	predicted protein
SS1G_12809	57	Y	S	0	--	Y?	--	--	--	--	--	--	--	--	--	predicted protein
SS1G_06126	58	Y	S	0	--	Y?	--	--	--	--	--	--	--	--	--	predicted protein
SS1G_00546	59	Y	S	0	--	Y?	--	--	--	--	--	--	--	--	--	predicted protein
SS1G_12721	62	Y	S	0	--	Y?	--	--	--	--	--	--	--	--	--	predicted protein
SS1G_07684	64	Y	S	0	--	Y?	--	--	--	--	--	--	--	--	--	predicted protein
SS1G_07888	65	Y	S	0	--	Y?	--	--	--	--	--	--	--	--	--	predicted protein
SS1G_10942	65	Y	S	0	--	Y?	--	--	--	--	--	--	--	--	--	predicted protein
SS1G_02344	67	Y	S	0	--	Y?	--	--	--	--	--	--	--	--	--	predicted protein
SS1G_05751	67	Y	S	0	--	Y?	--	--	--	--	--	--	--	--	--	predicted protein
SS1G_08164	67	Y	S	0	--	Y?	--	--	--	--	--	--	--	--	--	predicted protein
SS1G_08862	67	Y	S	0	--	Y?	--	--	--	--	--	--	--	--	--	predicted protein
SS1G_10668	69	Y	S	0	--	Y?	--	--	--	--	--	--	--	--	--	predicted protein
SS1G_08669	70	Y	S	0	--	Y?	--	--	--	--	--	--	--	--	--	hypothetical protein SS1G_08669
SS1G_00743	71	Y	S	0	--	Y?	--	--	--	--	--	--	--	--	--	predicted protein
SS1G_07076	72	Y	S	0	--	Y?	--	--	--	--	--	--	--	--	--	predicted protein
SS1G_03848	73	Y	S	0	--	Y?	--	--	--	--	--	--	--	--	--	predicted protein
SS1G_00784	74	Y	S	0	--	Y?	--	--	--	--	--	--	--	--	--	predicted protein
SS1G_02808	74	Y	S	0	--	Y?	--	--	--	--	--	--	--	--	--	predicted protein
SS1G_03607	76	Y	S	0	--	Y?	--	--	--	--	--	--	--	--	--	predicted protein
SS1G_14515	77	Y	S	0	--	Y?	--	--	--	--	--	--	--	--	--	predicted protein
SS1G_11706	78	Y	S	0	--	Y?	--	--	--	--	--	--	--	--	--	hypothetical protein SS1G_11706
SS1G_02800	79	Y	S	0	--	Y?	--	--	--	--	--	--	--	--	--	predicted protein
SS1G_07991	79	Y	S	0	--	Y?	--	--	--	--	--	--	--	--	--	predicted protein
SS1G_11696	80	Y	S	0	--	Y?	--	--	--	--	--	--	--	--	--	predicted protein
SS1G_07230	82	Y	S	0	--	Y?	--	--	--	--	--	--	--	--	--	predicted protein
SS1G_10659	82	Y	S	0	--	Y?	--	--	--	--	--	--	--	--	--	predicted protein
SS1G_11793	82	Y	S	0	--	Y?	--	--	--	--	--	--	--	--	--	predicted protein
SS1G_03711	83	Y	S	0	--	Y?	--	--	--	--	--	--	--	--	--	predicted protein
SS1G_13783	83	Y	S	0	--	Y?	--	--	--	--	--	--	--	--	--	predicted protein
SS1G_02545	86	Y	S	0	--	Y?	--	--	--	--	--	--	--	--	--	predicted protein
SS1G_05939	87	Y	S	0	--	Y?	--	--	--	--	--	--	--	--	--	predicted protein
SS1G_12720	87	Y	S	0	--	Y?	--	--	--	--	--	--	--	--	--	hypothetical protein SS1G_12720
SS1G_13888	88	Y	S	0	--	Y?	--	--	--	--	--	--	--	--	--	hypothetical protein SS1G_13888
SS1G_12885	89	Y	S	0	--	Y?	--	--	--	--	--	--	--	--	--	hypothetical protein SS1G_12885
SS1G_13898	89	Y	S	0	--	Y?	--	--	--	--	--	--	--	--	--	predicted protein
SS1G_04156	90	Y	S	0	--	Y?	--	--	--	--	--	--	--	--	--	predicted protein
SS1G_04874	92	Y	S	0	--	Y?	--	--	--	--	--	--	--	--	--	predicted protein
SS1G_08128	92	Y	S	0	--	Y?	--	--	--	--	--	--	--	--	--	predicted protein
SS1G_12080	92	Y	S	0	--	Y?	--	--	--	--	--	--	--	--	--	predicted protein
SS1G_06068	93	Y	S	0	--	Y?	--	--	--	--	--	--	--	--	--	predicted protein
SS1G_12961	95	Y	S	0	--	Y?	--	--	--	--	--	--	--	--	--	predicted protein
SS1G_02353	96	Y	S	0	--	Y?	--	--	--	--	--	--	--	--	--	predicted protein
SS1G_09994	96	Y	S	0	--	Y?	--	--	--	--	--	--	--	--	--	hypothetical protein SS1G_09994
SS1G_10934	96	Y	S	0	--	Y?	--	--	--	--	--	--	--	--	--	predicted protein
SS1G_01085	98	Y	S	0	--	Y?	--	--	--	--	--	--	--	--	--	predicted protein
SS1G_01214	98	Y	S	0	--	Y?	--	--	--	--	--	--	--	--	--	predicted protein
SS1G_13804	100	Y	S	0	--	Y?	--	--	--	--	--	--	--	--	--	predicted protein
SS1G_10152	102	Y	S	0	--	Y?	--	--	--	--	--	--	--	--	--	predicted protein
SS1G_05103	103	Y	S	0	--	Y?	--	--	--	--	--	--	--	--	--	hypothetical protein SS1G_05103
SS1G_02689	106	Y	S	0	--	Y?	--	--	--	--	--	--	--	--	--	predicted protein
SS1G_01003	108	Y	S	0	--	Y?	--	--	--	--	--	--	--	--	--	predicted protein
SS1G_00534	110	Y	S	0	--	Y?	--	--	--	--	--	--	--	--	--	predicted protein
SS1G_03537	110	Y	S	0	--	Y?	--	--	--	--	--	--	--	--	--	predicted protein
SS1G_10129	110	Y	S	0	--	Y?	--	--	--	--	--	--	--	--	--	predicted protein
SS1G_11895	111	Y	S	0	--	Y?	--	--	--	--	--	--	--	--	--	predicted protein
SS1G_02290	113	Y	S	0	--	Y?	--	--	--	--	--	--	--	--	--	predicted protein
SS1G_13235	114	Y	S	0	--	Y?	--	--	--	--	--	--	--	--	--	hypothetical protein SS1G_13235
SS1G_01817	116	Y	S	0	--	Y?	--	--	--	--	--	--	--	--	--	predicted protein
SS1G_01974	116	Y	S	0	--	Y?	--	--	--	--	--	--	--	--	--	predicted protein
SS1G_10956	117	Y	S	0	--	Y?	--	--	--	--	--	--	--	--	--	hypothetical protein SS1G_10956
SS1G_02690	118	Y	S	0	--	Y?	--	--	--	--	--	--	--	--	--	predicted protein
SS1G_01867	119	Y	S	0	--	Y?	--	--	--	--	--	--	--	--	--	hypothetical protein SS1G_01867
SS1G_12660	119	Y	S	0	--	Y?	--	--	--	--	--	--	--	--	--	predicted protein
SS1G_10451	121	Y	S	0	--	Y?	--	--	--	--	--	--	--	--	--	predicted protein
SS1G_00768	123	Y	S	0	--	Y?	--	--	--	--	--	--	--	--	--	predicted protein
SS1G_13965	125	Y	S	0	--	Y?	--	--	--	--	--	--	--	--	--	hypothetical protein SS1G_13965
SS1G_03000	126	Y	S	0	--	Y?	--	--	--	--	--	--	--	--	--	predicted protein
SS1G_03057	127	Y	S	0	--	Y?	--	--	--	--	--	--	--	--	--	hypothetical protein SS1G_03057
SS1G_03897	127	Y	S	0	--	Y?	--	--	--	--	--	--	--	--	--	predicted protein
SS1G_07354	129	Y	S	0	--	Y?	--	--	--	--	--	--	--	--	--	predicted protein
SS1G_09175	129	Y	S	0	--	Y?	--	--	--	--	--	--	--	--	--	predicted protein
SS1G_10082	129	Y	S	0	--	Y?	--	--	--	--	--	--	--	--	--	predicted protein
SS1G_10534	130	Y	S	0	--	Y?	--	--	--	--	--	--	--	--	--	hypothetical protein SS1G_10534
SS1G_13142	131	Y	S	0	--	Y?	--	--	--	--	--	--	--	--	--	predicted protein
SS1G_03878	132	Y	S	0	--	Y?	--	--	--	--	--	--	--	--	--	predicted protein
SS1G_09196	134	Y	S	0	--	Y?	--	--	--	--	--	--	--	--	--	predicted protein
SS1G_09288	135	Y	S	0	--	Y?	--	--	--	--	--	--	--	--	--	predicted protein
SS1G_10915	136	Y	S	0	--	Y?	--	--	--	--	--	--	--	--	--	predicted protein
SS1G_10096	137	Y	S	0	--	Y?	--	--	--	--	--	--	--	--	--	hypothetical protein SS1G_10096
SS1G_04857	139	Y	S	0	--	Y?	--	--	--	--	--	--	--	--	--	hypothetical protein SS1G_04857
SS1G_07491	140	Y	S	0	--	Y?	--	--	--	--	--	--	--	--	--	hypothetical protein SS1G_07491
SS1G_08860	141	Y	S	0	--	Y?	--	--	--	--	--	--	--	--	--	predicted protein
SS1G_02345	142	Y	S	0	--	Y?	--	--	--	--	--	--	--	--	--	hypothetical protein SS1G_02345
SS1G_04611	147	Y	S	0	--	Y?	--	--	--	--	--	--	--	--	--	predicted protein
SS1G_13126	147	Y	S	0	--	Y?	--	--	--	--	--	--	--	--	--	hypothetical protein SS1G_13126
SS1G_06747	151	Y	S	0	--	Y?	--	--	--	--	--	--	--	--	--	hypothetical protein SS1G_06747
SS1G_01810	152	Y	S	0	--	Y?	--	--	--	--	--	--	--	--	--	predicted protein
SS1G_09693	152	Y	S	0	--	Y?	--	--	--	--	--	--	--	--	--	predicted protein
SS1G_01086	153	Y	S	0	--	Y?	--	--	--	--	--	--	--	--	--	predicted protein
SS1G_00263	155	Y	S	0	--	Y?	--	--	--	--	--	--	--	--	--	predicted protein
SS1G_03830	155	Y	S	0	--	Y?	--	--	--	--	--	--	--	--	--	predicted protein
SS1G_04618	155	Y	S	0	--	Y?	--	--	--	--	--	--	--	--	--	predicted protein
SS1G_11151	156	Y	S	0	--	Y?	--	--	--	--	--	--	--	--	--	predicted protein
SS1G_12648	156	Y	S	0	--	Y?	--	--	--	--	--	--	--	--	--	predicted protein
SS1G_05152	158	Y	S	0	--	Y?	--	--	--	--	--	--	--	--	--	predicted protein
SS1G_14000	159	Y	S	0	--	Y?	--	--	--	--	--	--	--	--	--	predicted protein
SS1G_12856	160	Y	S	0	--	Y?	--	--	--	--	--	--	--	--	--	predicted protein
SS1G_14320	160	Y	S	0	--	Y?	--	--	--	--	--	--	--	--	--	predicted protein
SS1G_01226	161	Y	S	0	--	Y?	--	--	--	--	--	--	--	--	--	hypothetical protein SS1G_01226
SS1G_09766	162	Y	S	0	--	Y?	--	--	--	--	--	--	--	--	--	hypothetical protein SS1G_09766
SS1G_02068	163	Y	S	0	--	Y?	--	--	--	--	--	--	--	--	--	predicted protein
SS1G_05569	165	Y	S	0	--	Y?	--	--	--	--	--	--	--	--	--	hypothetical protein SS1G_05569
SS1G_00335	171	Y	S	0	--	Y?	--	--	--	--	--	--	--	--	--	predicted protein
SS1G_01073	171	Y	S	0	--	Y?	--	--	--	--	--	--	--	--	--	hypothetical protein SS1G_01073
SS1G_05890	171	Y	S	0	--	Y?	--	--	--	--	--	--	--	--	--	predicted protein
SS1G_14007	171	Y	S	0	--	Y?	--	--	--	--	--	--	--	--	--	predicted protein
SS1G_03523	172	Y	S	0	--	Y?	--	--	--	--	--	--	--	--	--	hypothetical protein SS1G_03523
SS1G_07613	172	Y	S	0	--	Y?	--	--	--	--	--	--	--	--	--	hypothetical protein SS1G_07613
SS1G_13705	173	Y	S	0	--	Y?	--	--	--	--	--	--	--	--	--	hypothetical protein SS1G_13705
SS1G_05780	175	Y	S	0	--	Y?	--	--	--	--	--	--	--	--	--	predicted protein
SS1G_09420	175	Y	S	0	--	Y?	--	--	--	--	--	--	--	--	--	hypothetical protein SS1G_09420
SS1G_05827	178	Y	S	0	--	Y?	--	--	--	--	--	--	--	--	--	hypothetical protein SS1G_05827
SS1G_06230	181	Y	S	0	--	Y?	--	--	--	--	--	--	--	--	--	hypothetical protein SS1G_06230
SS1G_02580	182	Y	S	0	--	Y?	--	--	--	--	--	--	--	--	--	predicted protein
SS1G_06713	182	Y	S	0	--	Y?	--	--	--	--	--	--	--	--	--	predicted protein
SS1G_06763	182	Y	S	0	--	Y?	--	--	--	--	--	--	--	--	--	predicted protein
SS1G_01235	183	Y	S	0	--	Y?	--	--	--	--	--	--	--	--	--	predicted protein
SS1G_13394	185	Y	S	0	--	Y?	--	--	--	--	--	--	--	--	--	predicted protein
SS1G_08110	188	Y	S	0	--	Y?	--	--	--	--	--	--	--	--	--	hypothetical protein SS1G_08110
SS1G_12361	188	Y	S	0	--	Y?	--	--	--	--	--	--	--	--	--	hypothetical protein SS1G_12361
SS1G_07320	189	Y	S	0	--	Y?	--	--	--	--	--	--	--	--	--	GTP-binding protein SARA
SS1G_03084	190	Y	S	0	--	Y?	--	--	--	--	--	--	--	--	--	hypothetical protein SS1G_03084
SS1G_01107	191	Y	S	0	--	Y?	--	--	--	--	--	--	--	--	--	predicted protein
SS1G_10892	191	Y	S	0	--	Y?	--	--	--	--	--	--	--	--	--	predicted protein
SS1G_03146	193	Y	S	0	--	Y?	--	--	--	--	--	--	--	--	--	hypothetical protein SS1G_03146
SS1G_10452	195	Y	S	0	--	Y?	--	--	--	--	--	--	--	--	--	predicted protein
SS1G_13668	195	Y	S	0	--	Y?	--	--	--	--	--	--	--	--	--	predicted protein
SS1G_03721	196	Y	S	0	--	Y?	--	--	--	--	--	--	--	--	--	hypothetical protein SS1G_03721
SS1G_12442	196	Y	S	0	--	Y?	--	--	--	--	--	--	--	--	--	hypothetical protein SS1G_12442
SS1G_02599	197	Y	S	0	--	Y?	--	--	--	--	--	--	--	--	--	predicted protein
SS1G_03709	197	Y	S	0	--	Y?	--	--	--	--	--	--	--	--	--	hypothetical protein SS1G_03709
SS1G_06119	197	Y	S	0	--	Y?	--	--	--	--	--	--	--	--	--	hypothetical protein SS1G_06119
SS1G_13881	198	Y	S	0	--	Y?	--	--	--	--	--	--	--	--	--	hypothetical protein SS1G_13881
SS1G_04429	200	Y	S	0	--	Y?	--	--	--	--	--	--	--	--	--	predicted protein
SS1G_13012	200	Y	S	0	--	Y?	--	--	--	--	--	--	--	--	--	hypothetical protein SS1G_13012
SS1G_03744	201	Y	S	0	--	Y?	--	--	--	--	--	--	--	--	--	hypothetical protein SS1G_03744
SS1G_06729	203	Y	S	0	--	Y?	--	--	--	--	--	--	--	--	--	endosomal P24B protein
SS1G_03656	204	Y	S	0	--	Y?	--	--	--	--	--	--	--	--	--	hypothetical protein SS1G_03656
SS1G_00762	205	Y	S	0	--	Y?	--	--	--	--	--	--	--	--	--	hypothetical protein SS1G_00762
SS1G_02486	206	Y	S	0	--	Y?	--	--	--	--	--	--	--	--	--	hypothetical protein SS1G_02486
SS1G_01287	207	Y	S	0	--	Y?	--	--	--	--	--	--	--	--	--	predicted protein
SS1G_11693	207	Y	S	0	--	Y?	--	--	--	--	--	--	--	--	--	hypothetical protein SS1G_11693
SS1G_12365	207	Y	S	0	--	Y?	--	--	--	--	--	--	--	--	--	hypothetical protein SS1G_12365
SS1G_14379	207	Y	S	0	--	Y?	--	--	--	--	--	--	--	--	--	hypothetical protein SS1G_14379
SS1G_04247	208	Y	S	0	--	Y?	--	--	--	--	--	--	--	--	--	predicted protein
SS1G_03917	209	Y	S	0	--	Y?	--	--	--	--	--	--	--	--	--	hypothetical protein SS1G_03917
SS1G_07532	209	Y	S	0	--	Y?	--	--	--	--	--	--	--	--	--	hypothetical protein SS1G_07532
SS1G_09232	210	Y	S	0	--	Y?	--	--	--	--	--	--	--	--	--	hypothetical protein SS1G_09232
SS1G_04766	211	Y	S	0	--	Y?	--	--	--	--	--	--	--	--	--	predicted protein
SS1G_11065	211	Y	S	0	--	Y?	--	--	--	--	--	--	--	--	--	predicted protein
SS1G_12468	211	Y	S	0	--	Y?	--	--	--	--	--	--	--	--	--	predicted protein
SS1G_03230	212	Y	S	0	--	Y?	--	--	--	--	--	--	--	--	--	hypothetical protein SS1G_03230
SS1G_05938	212	Y	S	0	--	Y?	--	--	--	--	--	--	--	--	--	hypothetical protein SS1G_05938
SS1G_12709	212	Y	S	0	--	Y?	--	--	--	--	--	--	--	--	--	hypothetical protein SS1G_12709
SS1G_05299	215	Y	S	0	--	Y?	--	--	--	--	--	--	--	--	--	predicted protein
SS1G_08790	215	Y	S	0	--	Y?	--	--	--	--	--	--	--	--	--	predicted protein
SS1G_09150	215	Y	S	0	--	Y?	--	--	--	--	--	--	--	--	--	predicted protein
SS1G_04885	221	Y	S	0	--	Y?	--	--	--	--	--	--	--	--	--	hypothetical protein SS1G_04885
SS1G_05075	222	Y	S	0	--	Y?	--	--	--	--	--	--	--	--	--	hypothetical protein SS1G_05075
SS1G_05326	222	Y	S	0	--	Y?	--	--	--	--	--	--	--	--	--	predicted protein
SS1G_07749	222	Y	S	0	--	Y?	--	--	--	--	--	--	--	--	--	hypothetical protein SS1G_07749
SS1G_10104	222	Y	S	0	--	Y?	--	--	--	--	--	--	--	--	--	hypothetical protein SS1G_10104
SS1G_13371	222	Y	S	0	--	Y?	--	--	--	--	--	--	--	--	--	hypothetical protein SS1G_13371
SS1G_02332	223	Y	S	0	--	Y?	--	--	--	--	--	--	--	--	--	predicted protein
SS1G_05337	223	Y	S	0	--	Y?	--	--	--	--	--	--	--	--	--	hypothetical protein SS1G_05337
SS1G_03819	224	Y	S	0	--	Y?	--	--	--	--	--	--	--	--	--	hypothetical protein SS1G_03819
SS1G_11499	224	Y	S	0	--	Y?	--	--	--	--	--	--	--	--	--	hypothetical protein SS1G_11499, partial
SS1G_09578	225	Y	S	0	--	Y?	--	--	--	--	--	--	--	--	--	hypothetical protein SS1G_09578
SS1G_09841	225	Y	S	0	--	Y?	--	--	--	--	--	--	--	--	--	predicted protein
SS1G_14041	225	Y	S	0	--	Y?	--	--	--	--	--	--	--	--	--	predicted protein
SS1G_10092	226	Y	S	0	--	Y?	--	--	--	--	--	--	--	--	--	hypothetical protein SS1G_10092
SS1G_01966	227	Y	S	0	--	Y?	--	--	--	--	--	--	--	--	--	predicted protein
SS1G_03535	228	Y	S	0	--	Y?	--	--	--	--	--	--	--	--	--	hypothetical protein SS1G_03535
SS1G_12482	230	Y	S	0	--	Y?	--	--	--	--	--	--	--	--	--	predicted protein
SS1G_07784	237	Y	S	0	--	Y?	--	--	--	--	--	--	--	--	--	hypothetical protein SS1G_07784
SS1G_01426	238	Y	S	0	--	Y?	--	--	--	--	--	--	--	--	--	hypothetical protein SS1G_01426
SS1G_11085	239	Y	S	0	--	Y?	--	--	--	--	--	--	--	--	--	predicted protein
SS1G_01851	241	Y	S	0	--	Y?	--	--	--	--	--	--	--	--	--	hypothetical protein SS1G_01851
SS1G_04934	242	Y	S	0	--	Y?	--	--	--	--	--	--	--	--	--	hypothetical protein SS1G_04934
SS1G_01734	244	Y	S	0	--	Y?	--	--	--	--	--	--	--	--	--	predicted protein
SS1G_02250	244	Y	S	0	--	Y?	--	--	--	--	--	--	--	--	--	predicted protein
SS1G_05334	245	Y	S	0	--	Y?	--	--	--	--	--	--	--	--	--	predicted protein
SS1G_14184	245	Y	S	0	--	Y?	--	--	--	--	--	--	--	--	--	predicted protein
SS1G_00501	246	Y	S	0	--	Y?	--	--	--	--	--	--	--	--	--	hypothetical protein SS1G_00501
SS1G_03080	246	Y	S	0	--	Y?	--	--	--	--	--	--	--	--	--	hypothetical protein SS1G_03080
SS1G_09278	246	Y	S	0	--	Y?	--	--	--	--	--	--	--	--	--	predicted protein
SS1G_11823	246	Y	S	0	--	Y?	--	--	--	--	--	--	--	--	--	predicted protein
SS1G_12052	246	Y	S	0	--	Y?	--	--	--	--	--	--	--	--	--	predicted protein
SS1G_05102	248	Y	S	0	--	Y?	--	--	--	--	--	--	--	--	--	hypothetical protein SS1G_05102
SS1G_05402	248	Y	S	0	--	Y?	--	--	--	--	--	--	--	--	--	hypothetical protein SS1G_05402
SS1G_11468	248	Y	S	0	--	Y?	--	--	--	--	--	--	--	--	--	hypothetical protein SS1G_11468
SS1G_06742	249	Y	S	0	--	Y?	--	--	--	--	--	--	--	--	--	hypothetical protein SS1G_06742
SS1G_01373	250	Y	S	0	--	Y?	--	--	--	--	--	--	--	--	--	hypothetical protein SS1G_01373
SS1G_02038	250	Y	S	0	--	Y?	--	--	--	--	--	--	--	--	--	hypothetical protein SS1G_02038
SS1G_03041	251	Y	S	0	--	Y?	--	--	--	--	--	--	--	--	--	hypothetical protein SS1G_03041
SS1G_02025	252	Y	S	0	--	Y?	--	--	--	--	--	--	--	--	--	hypothetical protein SS1G_02025
SS1G_02155	252	Y	S	0	--	Y?	--	--	--	--	--	--	--	--	--	hypothetical protein SS1G_02155
SS1G_03276	254	Y	S	0	--	Y?	--	--	--	--	--	--	--	--	--	hypothetical protein SS1G_03276
SS1G_11992	255	Y	S	0	--	Y?	--	--	--	--	--	--	--	--	--	hypothetical protein SS1G_11992
SS1G_13386	255	Y	S	0	--	Y?	--	--	--	--	--	--	--	--	--	hypothetical protein SS1G_13386
SS1G_06412	257	Y	S	0	--	Y?	--	--	--	--	--	--	--	--	--	hypothetical protein SS1G_06412
SS1G_08917	260	Y	S	0	--	Y?	--	--	--	--	--	--	--	--	--	predicted protein
SS1G_02845	261	Y	S	0	--	Y?	--	--	--	--	--	--	--	--	--	hypothetical protein SS1G_02845
SS1G_09379	262	Y	S	0	--	Y?	--	--	--	--	--	--	--	--	--	hypothetical protein SS1G_09379
SS1G_12963	263	Y	S	0	--	Y?	--	--	--	--	--	--	--	--	--	predicted protein
SS1G_09960	264	Y	S	0	--	Y?	--	--	--	--	--	--	--	--	--	hypothetical protein SS1G_09960
SS1G_07015	265	Y	S	0	--	Y?	--	--	--	--	--	--	--	--	--	hypothetical protein SS1G_07015
SS1G_01838	269	Y	S	0	--	Y?	--	--	--	--	--	--	--	--	--	hypothetical protein SS1G_01838
SS1G_05996	269	Y	S	0	--	Y?	--	--	--	--	--	--	--	--	--	hypothetical protein SS1G_05996
SS1G_00514	270	Y	S	0	--	Y?	--	--	--	--	--	--	--	--	--	hypothetical protein SS1G_00514
SS1G_06534	271	Y	S	0	--	Y?	--	--	--	--	--	--	--	--	--	hypothetical protein SS1G_06534
SS1G_09250	274	Y	S	0	--	Y?	--	--	--	--	--	--	--	--	--	predicted protein
SS1G_11223	275	Y	S	0	--	Y?	--	--	--	--	--	--	--	--	--	predicted protein
SS1G_12609	276	Y	S	0	--	Y?	--	--	--	--	--	--	--	--	--	hypothetical protein SS1G_12609
SS1G_04158	278	Y	S	0	--	Y?	--	--	--	--	--	--	--	--	--	hypothetical protein SS1G_04158
SS1G_13637	278	Y	S	0	--	Y?	--	--	--	--	--	--	--	--	--	hypothetical protein SS1G_13637
SS1G_07554	280	Y	S	0	--	Y?	--	--	--	--	--	--	--	--	--	predicted protein
SS1G_07837	280	Y	S	0	--	Y?	--	--	--	--	--	--	--	--	--	predicted protein
SS1G_03618	281	Y	S	0	--	Y?	--	--	--	--	--	--	--	--	--	hypothetical protein SS1G_03618
SS1G_04425	281	Y	S	0	--	Y?	--	--	--	--	--	--	--	--	--	hypothetical protein SS1G_04425
SS1G_02522	282	Y	S	0	--	Y?	--	--	--	--	--	--	--	--	--	predicted protein
SS1G_08621	283	Y	S	0	--	Y?	--	--	--	--	--	--	--	--	--	hypothetical protein SS1G_08621
SS1G_06890	284	Y	S	0	--	Y?	--	--	--	--	--	--	--	--	--	predicted protein
SS1G_08892	286	Y	S	0	--	Y?	--	--	--	--	--	--	--	--	--	predicted protein
SS1G_01495	290	Y	S	0	--	Y?	--	--	--	--	--	--	--	--	--	predicted protein
SS1G_13764	291	Y	S	0	--	Y?	--	--	--	--	--	--	--	--	--	hypothetical protein SS1G_13764
SS1G_06054	292	Y	S	0	--	Y?	--	--	--	--	--	--	--	--	--	hypothetical protein SS1G_06054
SS1G_12336	294	Y	S	0	--	Y?	--	--	--	--	--	--	--	--	--	hypothetical protein SS1G_12336
SS1G_05802	295	Y	S	0	--	Y?	--	--	--	--	--	--	--	--	--	hypothetical protein SS1G_05802
SS1G_12930	295	Y	S	0	--	Y?	--	--	--	--	--	--	--	--	--	hypothetical protein SS1G_12930
SS1G_13573	297	Y	S	0	--	Y?	--	--	--	--	--	--	--	--	--	hypothetical protein SS1G_13573
SS1G_09308	298	Y	S	0	--	Y?	--	--	--	--	--	--	--	--	--	predicted protein
SS1G_14289	298	Y	S	0	--	Y?	--	--	--	--	--	--	--	--	--	hypothetical protein SS1G_14289
SS1G_00809	299	Y	S	0	--	Y?	--	--	--	--	--	--	--	--	--	hypothetical protein SS1G_00809
SS1G_07289	299	Y	S	0	--	Y?	--	--	--	--	--	--	--	--	--	predicted protein
SS1G_01529	300	Y	S	0	--	Y?	--	--	--	--	--	--	--	--	--	hypothetical protein SS1G_01529
SS1G_08104	300	Y	S	0	--	Y?	--	--	--	--	--	--	--	--	--	hypothetical protein SS1G_08104
SS1G_00564	302	Y	S	0	--	N	--	--	--	--	--	--	--	--	--	predicted protein
SS1G_03610	303	Y	S	0	--	N	--	--	--	--	--	--	--	--	--	hypothetical protein SS1G_03610
SS1G_06817	303	Y	S	0	--	N	--	--	--	--	--	--	--	--	--	predicted protein
SS1G_14237	303	Y	S	0	--	N	--	--	--	--	--	--	--	--	--	hypothetical protein SS1G_14237
SS1G_10311	304	Y	S	0	--	N	--	--	--	--	--	--	--	--	--	hypothetical protein SS1G_10311
SS1G_08272	305	Y	S	0	--	N	--	--	--	--	--	--	--	--	--	hypothetical protein SS1G_08272
SS1G_13785	305	Y	S	0	--	N	--	--	--	--	--	--	--	--	--	hypothetical protein SS1G_13785
SS1G_03110	307	Y	S	0	--	N	--	--	--	--	--	--	--	--	--	hypothetical protein SS1G_03110
SS1G_05895	310	Y	S	0	--	N	--	--	--	--	--	--	--	--	--	hypothetical protein SS1G_05895
SS1G_08528	314	Y	S	0	--	N	--	--	--	--	--	--	--	--	--	hypothetical protein SS1G_08528
SS1G_09118	314	Y	S	0	--	N	--	--	--	--	--	--	--	--	--	hypothetical protein SS1G_09118
SS1G_12059	314	Y	S	0	--	N	--	--	--	--	--	--	--	--	--	hypothetical protein SS1G_12059
SS1G_09130	317	Y	S	0	--	N	--	--	--	--	--	--	--	--	--	hypothetical protein SS1G_09130
SS1G_03420	320	Y	S	0	--	N	--	--	--	--	--	--	--	--	--	hypothetical protein SS1G_03420
SS1G_09251	321	Y	S	0	--	N	--	--	--	--	--	--	--	--	--	hypothetical protein SS1G_09251
SS1G_11922	321	Y	S	0	--	N	--	--	--	--	--	--	--	--	--	hypothetical protein SS1G_11922
SS1G_01422	323	Y	S	0	--	N	--	--	--	--	--	--	--	--	--	hypothetical protein SS1G_01422
SS1G_02920	323	Y	S	0	--	N	--	--	--	--	--	--	--	--	--	predicted protein
SS1G_05013	323	Y	S	0	--	N	--	--	--	--	--	--	--	--	--	predicted protein
SS1G_02003	325	Y	S	0	--	N	--	--	--	--	--	--	--	--	--	hypothetical protein SS1G_02003
SS1G_04155	326	Y	S	0	--	N	--	--	--	--	--	--	--	--	--	hypothetical protein SS1G_04155
SS1G_00238	329	Y	S	0	--	N	--	--	--	--	--	--	--	--	--	hypothetical protein SS1G_00238
SS1G_04871	330	Y	S	0	--	N	--	--	--	--	--	--	--	--	--	hypothetical protein SS1G_04871
SS1G_05363	331	Y	S	0	--	N	--	--	--	--	--	--	--	--	--	hypothetical protein SS1G_05363
SS1G_05609	334	Y	S	0	--	N	--	--	--	--	--	--	--	--	--	hypothetical protein SS1G_05609
SS1G_13860	337	Y	S	0	--	N	--	--	--	--	--	--	--	--	--	hypothetical protein SS1G_13860
SS1G_10936	339	Y	S	0	--	N	--	--	--	--	--	--	--	--	--	predicted protein
SS1G_10482	340	Y	S	0	--	N	--	--	--	--	--	--	--	--	--	hypothetical protein SS1G_10482
SS1G_05257	342	Y	S	0	--	N	--	--	--	--	--	--	--	--	--	predicted protein
SS1G_09100	349	Y	S	0	--	N	--	--	--	--	--	--	--	--	--	hypothetical protein SS1G_09100
SS1G_11585	349	Y	S	0	--	N	--	--	--	--	--	--	--	--	--	hypothetical protein SS1G_11585
SS1G_00468	350	Y	S	0	--	N	--	--	--	--	--	--	--	--	--	hypothetical protein SS1G_00468
SS1G_02369	351	Y	S	0	--	N	--	--	--	--	--	--	--	--	--	hypothetical protein SS1G_02369
SS1G_09795	351	Y	S	0	--	N	--	--	--	--	--	--	--	--	--	hypothetical protein SS1G_09795
SS1G_09576	353	Y	S	0	--	N	--	--	--	--	--	--	--	--	--	hypothetical protein SS1G_09576
SS1G_12191	353	Y	S	0	--	N	--	--	--	--	--	--	--	--	--	hypothetical protein SS1G_12191
SS1G_08858	354	Y	S	0	--	N	--	--	--	--	--	--	--	--	--	hypothetical protein SS1G_08858
SS1G_03326	355	Y	S	0	--	N	--	--	--	--	--	--	--	--	--	hypothetical protein SS1G_03326
SS1G_12262	358	Y	S	0	--	N	--	--	--	--	--	--	--	--	--	hypothetical protein SS1G_12262
SS1G_09219	359	Y	S	0	--	N	--	--	--	--	--	--	--	--	--	hypothetical protein SS1G_09219
SS1G_05457	360	Y	S	0	--	N	--	--	--	--	--	--	--	--	--	hypothetical protein SS1G_05457
SS1G_06349	361	Y	S	0	--	N	--	--	--	--	--	--	--	--	--	hypothetical protein SS1G_06349
SS1G_01241	362	Y	S	0	--	N	--	--	--	--	--	--	--	--	--	predicted protein
SS1G_02655	364	Y	S	0	--	N	--	--	--	--	--	--	--	--	--	hypothetical protein SS1G_02655
SS1G_07558	364	Y	S	0	--	N	--	--	--	--	--	--	--	--	--	hypothetical protein SS1G_07558
SS1G_11929	364	Y	S	0	--	N	--	--	--	--	--	--	--	--	--	predicted protein
SS1G_00274	365	Y	S	0	--	N	--	--	--	--	--	--	--	--	--	hypothetical protein SS1G_00274
SS1G_00509	365	Y	S	0	--	N	--	--	--	--	--	--	--	--	--	hypothetical protein SS1G_00509
SS1G_01427	365	Y	S	0	--	N	--	--	--	--	--	--	--	--	--	hypothetical protein SS1G_01427
SS1G_14160	365	Y	S	0	--	N	--	--	--	--	--	--	--	--	--	hypothetical protein SS1G_14160
SS1G_03362	366	Y	S	0	--	N	--	--	--	--	--	--	--	--	--	hypothetical protein SS1G_03362
SS1G_07416	366	Y	S	0	--	N	--	--	--	--	--	--	--	--	--	hypothetical protein SS1G_07416
SS1G_04881	368	Y	S	0	--	N	--	--	--	--	--	--	--	--	--	hypothetical protein SS1G_04881
SS1G_11057	370	Y	S	0	--	N	--	--	--	--	--	--	--	--	--	hypothetical protein SS1G_11057
SS1G_03803	372	Y	S	0	--	N	--	--	--	--	--	--	--	--	--	hypothetical protein SS1G_03803
SS1G_07526	372	Y	S	0	--	N	--	--	--	--	--	--	--	--	--	hypothetical protein SS1G_07526
SS1G_11108	373	Y	S	0	--	N	--	--	--	--	--	--	--	--	--	hypothetical protein SS1G_11108
SS1G_01009	374	Y	S	0	--	N	--	--	--	--	--	--	--	--	--	hypothetical protein SS1G_01009
SS1G_01032	374	Y	S	0	--	N	--	--	--	--	--	--	--	--	--	predicted protein
SS1G_10496	375	Y	S	0	--	N	--	--	--	--	--	--	--	--	--	hypothetical protein SS1G_10496
SS1G_01485	377	Y	S	0	--	N	--	--	--	--	--	--	--	--	--	hypothetical protein SS1G_01485
SS1G_13115	377	Y	S	0	--	N	--	--	--	--	--	--	--	--	--	hypothetical protein SS1G_13115
SS1G_00421	378	Y	S	0	--	N	--	--	--	--	--	--	--	--	--	predicted protein
SS1G_00173	379	Y	S	0	--	N	--	--	--	--	--	--	--	--	--	hypothetical protein SS1G_00173
SS1G_04177	380	Y	S	0	--	N	--	--	--	--	--	--	--	--	--	polygalacturonase 5
SS1G_10167	380	Y	S	0	--	N	--	--	--	--	--	--	--	--	--	endo-polygalacturonase
SS1G_04281	381	Y	S	0	--	N	--	--	--	--	--	--	--	--	--	hypothetical protein SS1G_04281
SS1G_10071	381	Y	S	0	--	N	--	--	--	--	--	--	--	--	--	hypothetical protein SS1G_10071
SS1G_12481	381	Y	S	0	--	N	--	--	--	--	--	--	--	--	--	predicted protein
SS1G_14321	385	Y	S	0	--	N	--	--	--	--	--	--	--	--	--	hypothetical protein SS1G_14321
SS1G_00332	386	Y	S	0	--	N	--	--	--	--	--	--	--	--	--	hypothetical protein SS1G_00332
SS1G_03653	386	Y	S	0	--	N	--	--	--	--	--	--	--	--	--	hypothetical protein SS1G_03653
SS1G_08618	387	Y	S	0	--	N	--	--	--	--	--	--	--	--	--	LAP2
SS1G_09143	387	Y	S	0	--	N	--	--	--	--	--	--	--	--	--	hypothetical protein SS1G_09143
SS1G_04497	388	Y	S	0	--	N	--	--	--	--	--	--	--	--	--	hypothetical protein SS1G_04497
SS1G_04639	388	Y	S	0	--	N	--	--	--	--	--	--	--	--	--	hypothetical protein SS1G_04639
SS1G_10845	388	Y	S	0	--	N	--	--	--	--	--	--	--	--	--	predicted protein
SS1G_00458	389	Y	S	0	--	N	--	--	--	--	--	--	--	--	--	hypothetical protein SS1G_00458
SS1G_03576	392	Y	S	0	--	N	--	--	--	--	--	--	--	--	--	hypothetical protein SS1G_03576
SS1G_07942	392	Y	S	0	--	N	--	--	--	--	--	--	--	--	--	hypothetical protein SS1G_07942
SS1G_12917	394	Y	S	0	--	N	--	--	--	--	--	--	--	--	--	hypothetical protein SS1G_12917
SS1G_06653	395	Y	S	0	--	N	--	--	--	--	--	--	--	--	--	hypothetical protein SS1G_06653
SS1G_04552	396	Y	S	0	--	N	--	--	--	--	--	--	--	--	--	hypothetical protein SS1G_04552
SS1G_04923	396	Y	S	0	--	N	--	--	--	--	--	--	--	--	--	hypothetical protein SS1G_04923
SS1G_08208	396	Y	S	0	--	N	--	--	--	--	--	--	--	--	--	hypothetical protein SS1G_08208
SS1G_11818	396	Y	S	0	--	N	--	--	--	--	--	--	--	--	--	hypothetical protein SS1G_11818
SS1G_04786	399	Y	S	0	--	N	--	--	--	--	--	--	--	--	--	hypothetical protein SS1G_04786
SS1G_09495	399	Y	S	0	--	N	--	--	--	--	--	--	--	--	--	hypothetical protein SS1G_09495
SS1G_08894	401	Y	S	0	--	N	--	--	--	--	--	--	--	--	--	hypothetical protein SS1G_08894
SS1G_03181	402	Y	S	0	--	N	--	--	--	--	--	--	--	--	--	aspartate protease
SS1G_00040	403	Y	S	0	--	N	--	--	--	--	--	--	--	--	--	hypothetical protein SS1G_00040
SS1G_02714	403	Y	S	0	--	N	--	--	--	--	--	--	--	--	--	predicted protein
SS1G_06336	403	Y	S	0	--	N	--	--	--	--	--	--	--	--	--	hypothetical protein SS1G_06336
SS1G_07093	403	Y	S	0	--	N	--	--	--	--	--	--	--	--	--	hypothetical protein SS1G_07093
SS1G_10572	406	Y	S	0	--	N	--	--	--	--	--	--	--	--	--	hypothetical protein SS1G_10572
SS1G_08698	409	Y	S	0	--	N	--	--	--	--	--	--	--	--	--	hypothetical protein SS1G_08698
SS1G_12937	409	Y	S	0	--	N	--	--	--	--	--	--	--	--	--	hypothetical protein SS1G_12937
SS1G_02600	412	Y	S	0	--	N	--	--	--	--	--	--	--	--	--	hypothetical protein SS1G_02600
SS1G_01262	413	Y	S	0	--	N	--	--	--	--	--	--	--	--	--	hypothetical protein SS1G_01262
SS1G_11126	413	Y	S	0	--	N	--	--	--	--	--	--	--	--	--	hypothetical protein SS1G_11126
SS1G_14449	413	Y	S	0	--	N	--	--	--	--	--	--	--	--	--	hypothetical protein SS1G_14449
SS1G_04892	414	Y	S	0	--	N	--	--	--	--	--	--	--	--	--	hypothetical protein SS1G_04892
SS1G_05775	414	Y	S	0	--	N	--	--	--	--	--	--	--	--	--	hypothetical protein SS1G_05775
SS1G_13589	414	Y	S	0	--	N	--	--	--	--	--	--	--	--	--	hypothetical protein SS1G_13589
SS1G_13599	418	Y	S	0	--	N	--	--	--	--	--	--	--	--	--	hypothetical protein SS1G_13599
SS1G_09299	419	Y	S	0	--	N	--	--	--	--	--	--	--	--	--	predicted protein
SS1G_01428	420	Y	S	0	--	N	--	--	--	--	--	--	--	--	--	hypothetical protein SS1G_01428
SS1G_06009	420	Y	S	0	--	N	--	--	--	--	--	--	--	--	--	hypothetical protein SS1G_06009
SS1G_01749	423	Y	S	0	--	N	--	--	--	--	--	--	--	--	--	predicted protein
SS1G_11189	423	Y	S	0	--	N	--	--	--	--	--	--	--	--	--	hypothetical protein SS1G_11189
SS1G_01866	425	Y	S	0	--	N	--	--	--	--	--	--	--	--	--	hypothetical protein SS1G_01866
SS1G_10683	425	Y	S	0	--	N	--	--	--	--	--	--	--	--	--	hypothetical protein SS1G_10683
SS1G_02014	426	Y	S	0	--	N	--	--	--	--	--	--	--	--	--	hypothetical protein SS1G_02014
SS1G_11578	428	Y	S	0	--	N	--	--	--	--	--	--	--	--	--	hypothetical protein SS1G_11578
SS1G_10257	430	Y	S	0	--	N	--	--	--	--	--	--	--	--	--	hypothetical protein SS1G_10257
SS1G_03540	432	Y	S	0	--	N	--	--	--	--	--	--	--	--	--	hypothetical protein SS1G_03540
SS1G_05925	433	Y	S	0	--	N	--	--	--	--	--	--	--	--	--	hypothetical protein SS1G_05925
SS1G_03629	434	Y	S	0	--	N	--	--	--	--	--	--	--	--	--	aspartyl protease
SS1G_04790	436	Y	S	0	--	N	--	--	--	--	--	--	--	--	--	hypothetical protein SS1G_04790
SS1G_07039	436	Y	S	0	--	N	--	--	--	--	--	--	--	--	--	hypothetical protein SS1G_07039
SS1G_11700	437	Y	S	0	--	N	--	--	--	--	--	--	--	--	--	hypothetical protein SS1G_11700
SS1G_08493	438	Y	S	0	--	N	--	--	--	--	--	--	--	--	--	hypothetical protein SS1G_08493
SS1G_12294	439	Y	S	0	--	N	--	--	--	--	--	--	--	--	--	hypothetical protein SS1G_12294
SS1G_00746	440	Y	S	0	--	N	--	--	--	--	--	--	--	--	--	hypothetical protein SS1G_00746
SS1G_11579	441	Y	S	0	--	N	--	--	--	--	--	--	--	--	--	hypothetical protein SS1G_11579
SS1G_04207	445	Y	S	0	--	N	--	--	--	--	--	--	--	--	--	hypothetical protein SS1G_04207
SS1G_12509	447	Y	S	0	--	N	--	--	--	--	--	--	--	--	--	hypothetical protein SS1G_12509
SS1G_01776	448	Y	S	0	--	N	--	--	--	--	--	--	--	--	--	hypothetical protein SS1G_01776
SS1G_04116	450	Y	S	0	--	N	--	--	--	--	--	--	--	--	--	hypothetical protein SS1G_04116
SS1G_09020	450	Y	S	0	--	N	--	--	--	--	--	--	--	--	--	hypothetical protein SS1G_09020
SS1G_07825	452	Y	S	0	--	N	--	--	--	--	--	--	--	--	--	hypothetical protein SS1G_07825
SS1G_08215	452	Y	S	0	--	N	--	--	--	--	--	--	--	--	--	predicted protein
SS1G_07022	453	Y	S	0	--	N	--	--	--	--	--	--	--	--	--	hypothetical protein SS1G_07022
SS1G_07498	454	Y	S	0	--	N	--	--	--	--	--	--	--	--	--	hypothetical protein SS1G_07498
SS1G_09050	454	Y	S	0	--	N	--	--	--	--	--	--	--	--	--	predicted protein
SS1G_04852	455	Y	S	0	--	N	--	--	--	--	--	--	--	--	--	hypothetical protein SS1G_04852
SS1G_05832	455	Y	S	0	--	N	--	--	--	--	--	--	--	--	--	hypothetical protein SS1G_05832
SS1G_08814	455	Y	S	0	--	N	--	--	--	--	--	--	--	--	--	hypothetical protein SS1G_08814
SS1G_10353	457	Y	S	0	--	N	--	--	--	--	--	--	--	--	--	hypothetical protein SS1G_10353
SS1G_08644	459	Y	S	0	--	N	--	--	--	--	--	--	--	--	--	hypothetical protein SS1G_08644
SS1G_04850	462	Y	S	0	--	N	--	--	--	--	--	--	--	--	--	hypothetical protein SS1G_04850
SS1G_08542	464	Y	S	0	--	N	--	--	--	--	--	--	--	--	--	hypothetical protein SS1G_08542
SS1G_14460	466	Y	S	0	--	N	--	--	--	--	--	--	--	--	--	hypothetical protein SS1G_14460
SS1G_02131	467	Y	S	0	--	N	--	--	--	--	--	--	--	--	--	predicted protein
SS1G_10161	467	Y	S	0	--	N	--	--	--	--	--	--	--	--	--	hypothetical protein SS1G_10161
SS1G_05612	468	Y	S	0	--	N	--	--	--	--	--	--	--	--	--	hypothetical protein SS1G_05612
SS1G_06235	469	Y	S	0	--	N	--	--	--	--	--	--	--	--	--	hypothetical protein SS1G_06235
SS1G_10923	469	Y	S	0	--	N	--	--	--	--	--	--	--	--	--	predicted protein
SS1G_12724	471	Y	S	0	--	N	--	--	--	--	--	--	--	--	--	hypothetical protein SS1G_12724
SS1G_12765	472	Y	S	0	--	N	--	--	--	--	--	--	--	--	--	hypothetical protein SS1G_12765
SS1G_12024	473	Y	S	0	--	N	--	--	--	--	--	--	--	--	--	hypothetical protein SS1G_12024
SS1G_07280	475	Y	S	0	--	N	--	--	--	--	--	--	--	--	--	hypothetical protein SS1G_07280
SS1G_08786	475	Y	S	0	--	N	--	--	--	--	--	--	--	--	--	predicted protein
SS1G_11366	480	Y	S	0	--	N	--	--	--	--	--	--	--	--	--	hypothetical protein SS1G_11366
SS1G_06513	481	Y	S	0	--	N	--	--	--	--	--	--	--	--	--	predicted protein
SS1G_00624	482	Y	S	0	--	N	--	--	--	--	--	--	--	--	--	hypothetical protein SS1G_00624
SS1G_10698	482	Y	S	0	--	N	--	--	--	--	--	--	--	--	--	hypothetical protein SS1G_10698
SS1G_01109	487	Y	S	0	--	N	--	--	--	--	--	--	--	--	--	hypothetical protein SS1G_01109
SS1G_12263	492	Y	S	0	--	N	--	--	--	--	--	--	--	--	--	hypothetical protein SS1G_12263
SS1G_11768	496	Y	S	0	--	N	--	--	--	--	--	--	--	--	--	hypothetical protein SS1G_11768
SS1G_12283	497	Y	S	0	--	N	--	--	--	--	--	--	--	--	--	hypothetical protein SS1G_12283
SS1G_02370	501	Y	S	0	--	N	--	--	--	--	--	--	--	--	--	hypothetical protein SS1G_02370
SS1G_04490	506	Y	S	0	--	N	--	--	--	--	--	--	--	--	--	hypothetical protein SS1G_04490
SS1G_12043	507	Y	S	0	--	N	--	--	--	--	--	--	--	--	--	hypothetical protein SS1G_12043
SS1G_07901	508	Y	S	0	--	N	--	--	--	--	--	--	--	--	--	hypothetical protein SS1G_07901
SS1G_01378	510	Y	S	0	--	N	--	--	--	--	--	--	--	--	--	hypothetical protein SS1G_01378
SS1G_05278	511	Y	S	0	--	N	--	--	--	--	--	--	--	--	--	predicted protein
SS1G_07552	513	Y	S	0	--	N	--	--	--	--	--	--	--	--	--	hypothetical protein SS1G_07552
SS1G_08907	515	Y	S	0	--	N	--	--	--	--	--	--	--	--	--	hypothetical protein SS1G_08907
SS1G_00978	518	Y	S	0	--	N	--	--	--	--	--	--	--	--	--	hypothetical protein SS1G_00978
SS1G_03029	518	Y	S	0	--	N	--	--	--	--	--	--	--	--	--	hypothetical protein SS1G_03029
SS1G_04946	521	Y	S	0	--	N	--	--	--	--	--	--	--	--	--	hypothetical protein SS1G_04946
SS1G_03282	522	Y	S	0	--	N	--	--	--	--	--	--	--	--	--	serine protease
SS1G_13470	522	Y	S	0	--	N	--	--	--	--	--	--	--	--	--	hypothetical protein SS1G_13470
SS1G_11930	524	Y	S	0	--	N	--	--	--	--	--	--	--	--	--	hypothetical protein SS1G_11930
SS1G_10981	528	Y	S	0	--	N	--	--	--	--	--	--	--	--	--	hypothetical protein SS1G_10981
SS1G_13935	529	Y	S	0	--	N	--	--	--	--	--	--	--	--	--	predicted protein
SS1G_02967	531	Y	S	0	--	N	--	--	--	--	--	--	--	--	--	hypothetical protein SS1G_02967
SS1G_03361	535	Y	S	0	--	N	--	--	--	--	--	--	--	--	--	hypothetical protein SS1G_03361
SS1G_13982	535	Y	S	0	--	N	--	--	--	--	--	--	--	--	--	hypothetical protein SS1G_13982
SS1G_10875	536	Y	S	0	--	N	--	--	--	--	--	--	--	--	--	hypothetical protein SS1G_10875
SS1G_05315	537	Y	S	0	--	N	--	--	--	--	--	--	--	--	--	hypothetical protein SS1G_05315
SS1G_12017	540	Y	S	0	--	N	--	--	--	--	--	--	--	--	--	hypothetical protein SS1G_12017
SS1G_02399	542	Y	S	0	--	N	--	--	--	--	--	--	--	--	--	hypothetical protein SS1G_02399
SS1G_05677	543	Y	S	0	--	N	--	--	--	--	--	--	--	--	--	hypothetical protein SS1G_05677
SS1G_14441	543	Y	S	0	--	N	--	--	--	--	--	--	--	--	--	hypothetical protein SS1G_14441
SS1G_08295	546	Y	S	0	--	N	--	--	--	--	--	--	--	--	--	hypothetical protein SS1G_08295
SS1G_12500	546	Y	S	0	--	N	--	--	--	--	--	--	--	--	--	hypothetical protein SS1G_12500
SS1G_11765	547	Y	S	0	--	N	--	--	--	--	--	--	--	--	--	hypothetical protein SS1G_11765
SS1G_01116	549	Y	S	0	--	N	--	--	--	--	--	--	--	--	--	hypothetical protein SS1G_01116
SS1G_00781	551	Y	S	0	--	N	--	--	--	--	--	--	--	--	--	hypothetical protein SS1G_00781
SS1G_07184	551	Y	S	0	--	N	--	--	--	--	--	--	--	--	--	hypothetical protein SS1G_07184
SS1G_09475	554	Y	S	0	--	N	--	--	--	--	--	--	--	--	--	hypothetical protein SS1G_09475
SS1G_03385	561	Y	S	0	--	N	--	--	--	--	--	--	--	--	--	hypothetical protein SS1G_03385
SS1G_00642	563	Y	S	0	--	N	--	--	--	--	--	--	--	--	--	hypothetical protein SS1G_00642
SS1G_01236	566	Y	S	0	--	N	--	--	--	--	--	--	--	--	--	hypothetical protein SS1G_01236
SS1G_11853	566	Y	S	0	--	N	--	--	--	--	--	--	--	--	--	hypothetical protein SS1G_11853
SS1G_00376	567	Y	S	0	--	N	--	--	--	--	--	--	--	--	--	hypothetical protein SS1G_00376
SS1G_03160	567	Y	S	0	--	N	--	--	--	--	--	--	--	--	--	hypothetical protein SS1G_03160
SS1G_04442	574	Y	S	0	--	N	--	--	--	--	--	--	--	--	--	hypothetical protein SS1G_04442
SS1G_05784	574	Y	S	0	--	N	--	--	--	--	--	--	--	--	--	hypothetical protein SS1G_05784
SS1G_02495	576	Y	S	0	--	N	--	--	--	--	--	--	--	--	--	hypothetical protein SS1G_02495
SS1G_06765	576	Y	S	0	--	N	--	--	--	--	--	--	--	--	--	hypothetical protein SS1G_06765
SS1G_05493	577	Y	S	0	--	N	--	--	--	--	--	--	--	--	--	hypothetical protein SS1G_05493
SS1G_10768	577	Y	S	0	--	N	--	--	--	--	--	--	--	--	--	hypothetical protein SS1G_10768
SS1G_10038	579	Y	S	0	--	N	--	--	--	--	--	--	--	--	--	hypothetical protein SS1G_10038
SS1G_12320	579	Y	S	0	--	N	--	--	--	--	--	--	--	--	--	hypothetical protein SS1G_12320
SS1G_08361	583	Y	S	0	--	N	--	--	--	--	--	--	--	--	--	hypothetical protein SS1G_08361
SS1G_04958	585	Y	S	0	--	N	--	--	--	--	--	--	--	--	--	hypothetical protein SS1G_04958
SS1G_02119	586	Y	S	0	--	N	--	--	--	--	--	--	--	--	--	hypothetical protein SS1G_02119
SS1G_03387	587	Y	S	0	--	N	--	--	--	--	--	--	--	--	--	hypothetical protein SS1G_03387
SS1G_12499	587	Y	S	0	--	N	--	--	--	--	--	--	--	--	--	hypothetical protein SS1G_12499
SS1G_04945	589	Y	S	0	--	N	--	--	--	--	--	--	--	--	--	hypothetical protein SS1G_04945
SS1G_14293	589	Y	S	0	--	N	--	--	--	--	--	--	--	--	--	hypothetical protein SS1G_14293
SS1G_12945	590	Y	S	0	--	N	--	--	--	--	--	--	--	--	--	hypothetical protein SS1G_12945
SS1G_04725	593	Y	S	0	--	N	--	--	--	--	--	--	--	--	--	hypothetical protein SS1G_04725
SS1G_13110	593	Y	S	0	--	N	--	--	--	--	--	--	--	--	--	hypothetical protein SS1G_13110
SS1G_09129	594	Y	S	0	--	N	--	--	--	--	--	--	--	--	--	hypothetical protein SS1G_09129
SS1G_04196	596	Y	S	0	--	N	--	--	--	--	--	--	--	--	--	hypothetical protein SS1G_04196
SS1G_01662	599	Y	S	0	--	N	--	--	--	--	--	--	--	--	--	hypothetical protein SS1G_01662
SS1G_05112	600	Y	S	0	--	N	--	--	--	--	--	--	--	--	--	laccase precursor
SS1G_05644	604	Y	S	0	--	N	--	--	--	--	--	--	--	--	--	hypothetical protein SS1G_05644
SS1G_04343	605	Y	S	0	--	N	--	--	--	--	--	--	--	--	--	hypothetical protein SS1G_04343
SS1G_09861	611	Y	S	0	--	N	--	--	--	--	--	--	--	--	--	hypothetical protein SS1G_09861
SS1G_13922	611	Y	S	0	--	N	--	--	--	--	--	--	--	--	--	hypothetical protein SS1G_13922
SS1G_07579	613	Y	S	0	--	N	--	--	--	--	--	--	--	--	--	hypothetical protein SS1G_07579
SS1G_00265	617	Y	S	0	--	N	--	--	--	--	--	--	--	--	--	hypothetical protein SS1G_00265
SS1G_03602	617	Y	S	0	--	N	--	--	--	--	--	--	--	--	--	hypothetical protein SS1G_03602
SS1G_03518	619	Y	S	0	--	N	--	--	--	--	--	--	--	--	--	hypothetical protein SS1G_03518
SS1G_10949	619	Y	S	0	--	N	--	--	--	--	--	--	--	--	--	glucose oxidase
SS1G_13809	622	Y	S	0	--	N	--	--	--	--	--	--	--	--	--	hypothetical protein SS1G_13809
SS1G_10728	623	Y	S	0	--	N	--	--	--	--	--	--	--	--	--	predicted protein
SS1G_00271	624	Y	S	0	--	N	--	--	--	--	--	--	--	--	--	hypothetical protein SS1G_00271
SS1G_11332	624	Y	S	0	--	N	--	--	--	--	--	--	--	--	--	hypothetical protein SS1G_11332
SS1G_00730	628	Y	S	0	--	N	--	--	--	--	--	--	--	--	--	hypothetical protein SS1G_00730
SS1G_09268	632	Y	S	0	--	N	--	--	--	--	--	--	--	--	--	hypothetical protein SS1G_09268
SS1G_10684	641	Y	S	0	--	N	--	--	--	--	--	--	--	--	--	hypothetical protein SS1G_10684
SS1G_11600	654	Y	S	0	--	N	--	--	--	--	--	--	--	--	--	hypothetical protein SS1G_11600
SS1G_07268	669	Y	S	0	--	N	--	--	--	--	--	--	--	--	--	hypothetical protein SS1G_07268
SS1G_11382	671	Y	S	0	--	N	--	--	--	--	--	--	--	--	--	hypothetical protein SS1G_11382
SS1G_00233	672	Y	S	0	--	N	--	--	--	--	--	--	--	--	--	hypothetical protein SS1G_00233
SS1G_02857	680	Y	S	0	--	N	--	--	--	--	--	--	--	--	--	hypothetical protein SS1G_02857
SS1G_13501	683	Y	S	0	--	N	--	--	--	--	--	--	--	--	--	hypothetical protein SS1G_13501
SS1G_14497	683	Y	S	0	--	N	--	--	--	--	--	--	--	--	--	hypothetical protein SS1G_14497
SS1G_00395	700	Y	S	0	--	N	--	--	--	--	--	--	--	--	--	predicted protein
SS1G_04541	713	Y	S	0	--	N	--	--	--	--	--	--	--	--	--	hypothetical protein SS1G_04541
SS1G_09909	731	Y	S	0	--	N	--	--	--	--	--	--	--	--	--	hypothetical protein SS1G_09909
SS1G_01587	758	Y	S	0	--	N	--	--	--	--	--	--	--	--	--	predicted protein
SS1G_07393	782	Y	S	0	--	N	--	--	--	--	--	--	--	--	--	hypothetical protein SS1G_07393
SS1G_11535	796	Y	S	0	--	N	--	--	--	--	--	--	--	--	--	hypothetical protein SS1G_11535
SS1G_05368	803	Y	S	0	--	N	--	--	--	--	--	--	--	--	--	hypothetical protein SS1G_05368
SS1G_06264	816	Y	S	0	--	N	--	--	--	--	--	--	--	--	--	hypothetical protein SS1G_06264
SS1G_07496	821	Y	S	0	--	N	--	--	--	--	--	--	--	--	--	hypothetical protein SS1G_07496
SS1G_13255	841	Y	S	0	--	N	--	--	--	--	--	--	--	--	--	hypothetical protein SS1G_13255
SS1G_08744	843	Y	S	0	--	N	--	--	--	--	--	--	--	--	--	hypothetical protein SS1G_08744
SS1G_11256	859	Y	S	0	--	N	--	--	--	--	--	--	--	--	--	hypothetical protein SS1G_11256
SS1G_07863	860	Y	S	0	--	N	--	--	--	--	--	--	--	--	--	hypothetical protein SS1G_07863
SS1G_09169	878	Y	S	0	--	N	--	--	--	--	--	--	--	--	--	predicted protein
SS1G_07162	888	Y	S	0	--	N	--	--	--	--	--	--	--	--	--	hypothetical protein SS1G_07162
SS1G_07146	891	Y	S	0	--	N	--	--	--	--	--	--	--	--	--	beta-glucosidase 1 precursor
SS1G_01005	904	Y	S	0	--	N	--	--	--	--	--	--	--	--	--	hypothetical protein SS1G_01005
SS1G_09000	916	Y	S	0	--	N	--	--	--	--	--	--	--	--	--	hypothetical protein SS1G_09000
SS1G_01678	965	Y	S	0	--	N	--	--	--	--	--	--	--	--	--	hypothetical protein SS1G_01678
SS1G_10842	984	Y	S	0	--	N	--	--	--	--	--	--	--	--	--	hypothetical protein SS1G_10842
SS1G_03221	985	Y	S	0	--	N	--	--	--	--	--	--	--	--	--	hypothetical protein SS1G_03221
SS1G_03647	1012	Y	S	0	--	N	--	--	--	--	--	--	--	--	--	hypothetical protein SS1G_03647
SS1G_00311	1017	Y	S	0	--	N	--	--	--	--	--	--	--	--	--	hypothetical protein SS1G_00311
SS1G_03268	1041	Y	S	0	--	N	--	--	--	--	--	--	--	--	--	hypothetical protein SS1G_03268
SS1G_11910	1097	Y	S	0	--	N	--	--	--	--	--	--	--	--	--	predicted protein
SS1G_05494	1160	Y	S	0	--	N	--	--	--	--	--	--	--	--	--	hypothetical protein SS1G_05494
SS1G_04264	1180	Y	S	0	--	N	--	--	--	--	--	--	--	--	--	hypothetical protein SS1G_04264
SS1G_04312	1186	Y	S	0	--	N	--	--	--	--	--	--	--	--	--	predicted protein
SS1G_12239	1336	Y	S	0	--	N	--	--	--	--	--	--	--	--	--	hypothetical protein SS1G_12239
SS1G_11129	1493	Y	S	0	--	N	--	--	--	--	--	--	--	--	--	hypothetical protein SS1G_11129
SS1G_06849	2003	Y	S	0	--	N	--	--	--	--	--	--	--	--	--	hypothetical protein SS1G_06849
SS1G_10704	2088	Y	S	0	--	N	--	--	--	--	--	--	--	--	--	hypothetical protein SS1G_10704
1SignalP, putative secretory proteins with signal peptides in S. sclerotiroum(Y).
2TargetP, putative secretory proteins with predicts the presence of N-terminal presequences signal peptide in S. sclerotiroum(S) or mitochondrial transit peptide (M).
3TMHMM, the number of putative transmembrane helices site of proteins from S. sclerotiroum.
4PredGPI(Y)/KoGPI(N), a putative GPI-anchored protein predicted by PredGPI with a yes (Y) resulte and the protein predicted by KoGPI without GPI-anchored site (N). --, Not predicted.
5effector, a predicted effector in S. sclerotiroum and confirmed with the RNA_seq is given a character Y. Characters Y? represents the effector was just predicted with bioinfomation program. Characters N represents the protein is a predicted effector.
6SsCm0h, SsCm4h, and SsCm12h represent the number of clean reads of interactional RNA_seq at 0 h, 4 h, and 12 h, respectively. --, no detected with clean reads.
7SsCm0h-RPKM, SsCm4h-RPKM, SsCm12h-RPKM represent the normalized RPKM value expression. --, no available for normalized the gene expression.
8log2RPKM(SsCm4h/SsCm0h), log2RPKM(SsCm12h/SsCm0h), and log2RPKM(SsCm12h/SsCm4h) represent the changed fold of the DEGs in 0-4 hpi, 0-12 hpi and 4-12 hpi, respectively.
