# Supplementary material for: Host Transcriptional Response of Sclerotinia sclerotiorum Induced by the Mycoparasite Coniothyrium minitans
Source: Front Microbiol. 2020 Feb 11;11:183. doi: 10.3389/fmicb.2020.00183 (PMC7026392; doi:10.3389/fmicb.2020.00183)
Supplement: TABLE S6 — Gene list of the unclassified DEGs in S. sclerotiorum induced by C. minitans. [file Table_6.XLSX]

## Sheet: unclassfitied (2)
Table S6 The unclassified DEGs in S. sclerotiorum induced by C. minitans
gene ID	gene Length	SsCm0h	SsCm4h	SsCm12h	SsCm0h-RPKM	SsCm4h-RPKM	SsCm12h-RPKM	log2RPKM(SsCm4h/SsCm0h)	log2RPKM(SsCm12h/SsCm0h)	log2RPKM(SsCm12h/SsCm4h)	Nr annotation	Pfam Acc	Pfam Family Abbreviation	Pfam Family	Clan Acc
SS1G_00091	2125	307	82	90	38.7677	12.0555	13.371	-1.68517	-1.53575	0.149419	hypothetical protein SS1G_00091	PF05282.11	AAR2	AAR2 protein
SS1G_09266	390	45	19	54	30.9626	15.2201	43.7128	-1.02455	0.497528	1.52208	hypothetical protein SS1G_09266	PF00248.21	Aldo_ket_red	Aldo/keto reductase family
SS1G_09844	677	2	18	13	0.792741	8.3064	6.06226	3.3893	2.93493	-0.454368	predicted protein	PF09792.9	But2
SS1G_02828	777	426	1014	1542	147.122	407.705	626.532	1.47051	2.09037	0.619863	predicted protein	PF17615.2	C166
SS1G_03611	1433	515	277	984	96.4387	60.3897	216.785	-0.67531	1.16858	1.84389	predicted protein	PF05730.11	CFEM	CFEM domain
SS1G_07295	721	23	11	88	8.56018	4.76636	38.5325	-0.844754	2.17036	3.01512	hypothetical protein SS1G_07295	PF05730.11	CFEM	CFEM domain
SS1G_14307	849	53	122	143	16.7517	44.8933	53.1751	1.42219	1.66644	0.244252	predicted protein	PF05730.11	CFEM	CFEM domain
SS1G_02538	530	3	23	18	1.51892	13.5575	10.722	3.15798	2.81946	-0.338519	predicted protein	PF14420.6	Clr5
SS1G_06146	2896	20	0	4	1.8532	0.001	0.436055	-10.8558	-2.08743	8.76837	hypothetical protein SS1G_06146	PF07989.11	Cnn_1N
SS1G_03590	2431	49	19	54	5.4088	2.44173	7.01275	-1.14741	0.374671	1.52208	hypothetical protein SS1G_03590	PF05205.12	COMPASS-Shg1	COMPASS (Complex proteins associated with Set1p) component shg1
SS1G_08524	698	26	0	9	9.99558	0.001	4.07068	-13.2871	-1.29602	11.9911	predicted protein	PF08507.10	COPI_assoc	COPI associated protein
SS1G_13779	689	126	26	78	49.0729	11.7892	35.7401	-2.05746	-0.457384	1.60008	predicted protein	PF09724.9	Dcc1	Sister chromatid cohesion protein Dcc1
SS1G_00289	1714	105	14	33	16.4387	2.5518	6.07831	-2.68751	-1.43536	1.25216	hypothetical protein SS1G_00289	PF06884.11	DUF1264	Protein of unknown function (DUF1264)
SS1G_10598	785	111	284	125	37.944	113.026	50.2713	1.57471	0.405862	-1.16885	hypothetical protein SS1G_10598	PF08570.10	DUF1761	Protein of unknown function (DUF1761)
SS1G_12084	650	16	5	27	6.60536	2.40318	13.1139	-1.4587	0.989381	2.44808	hypothetical protein SS1G_12084	PF08719.11	DUF1768	ribofla_fusion: conserved hypothetical protein
SS1G_14249	1558	110	29	55	18.9459	5.81513	11.1449	-1.704	-0.765506	0.938496	hypothetical protein SS1G_14249	PF02656.15	DUF202	Domain of unknown function DUF
SS1G_13385	1619	56	8	11	9.28178	1.54373	2.14499	-2.58798	-2.11343	0.474549	hypothetical protein SS1G_13385	PF09949.9	DUF2183	Uncharacterized conserved protein (DUF2183)
SS1G_08983	2045	26	24	101	3.41169	3.66646	15.5922	0.103899	2.19227	2.08837	hypothetical protein SS1G_08983	PF10022.9	DUF2264	Uncharacterized protein conserved in bacteria (DUF2264)
SS1G_07131	1581	44	30	85	7.46811	5.92814	16.9733	-0.333165	1.18445	1.51762	hypothetical protein SS1G_07131	PF10998.8	DUF2838	Protein of unknown function (DUF2838)
SS1G_07456	2125	12	4	73	1.51535	0.588071	10.8454	-1.36559	2.83936	4.20494	hypothetical protein SS1G_07456	PF11001.8	DUF2841	Protein of unknown function (DUF2841)
SS1G_14491	2116	13	43	43	1.64861	6.34866	6.41553	1.9452	1.96032	0.0151175	hypothetical protein SS1G_14491	PF11696.8	DUF3292	Protein of unknown function (DUF3292)
SS1G_10441	1056	3	2	31	0.762338	0.591691	9.26782	-0.365586	3.60373	3.96931	hypothetical protein SS1G_10441	PF11807.8	DUF3328	Domain of unknown function (DUF3328)
SS1G_10906	760	196	178	527	69.2042	73.1704	218.916	0.0803999	1.66144	1.58104	hypothetical protein sscle_09g068980	PF11807.8	DUF3328	Domain of unknown function (DUF3328)
SS1G_13355	939	1573	4448	4563	449.524	1479.89	1534.14	1.71901	1.77096	0.0519434	predicted protein	PF11807.8	DUF3328	Domain of unknown function (DUF3328)
SS1G_13358	927	929	2473	2933	268.922	833.438	998.877	1.63189	1.89312	0.261232	predicted protein	PF11807.8	DUF3328	Domain of unknown function (DUF3328)
SS1G_13850	805	122	250	359	40.6681	97.0226	140.792	1.25442	1.7916	0.537173	predicted protein	PF11807.8	DUF3328	Domain of unknown function (DUF3328)
SS1G_05730	1137	889	170	457	209.813	46.7108	126.892	-2.16727	-0.725495	1.44178	hypothetical protein SS1G_05730	PF11911.8	DUF3429	Protein of unknown function (DUF3429)
SS1G_01370	1458	83	97	215	15.276	20.7847	46.5544	0.44425	1.60765	1.1634	hypothetical protein SS1G_01370	PF11927.8	DUF3445	Protein of unknown function (DUF3445)
SS1G_04671	1220	30	35	80	6.5986	8.96267	20.7019	0.441769	1.64953	1.20776	hypothetical protein sscle_02g015040	PF11927.8	DUF3445	Protein of unknown function (DUF3445)
SS1G_04817	1190	48	16	126	10.8239	4.20051	33.4275	-1.36559	1.62681	2.9924	hypothetical protein SS1G_04817	PF11927.8	DUF3445	Protein of unknown function (DUF3445)
SS1G_06862	1970	20	10	46	2.72429	1.58585	7.37176	-0.780624	1.43613	2.21675	hypothetical protein sscle_13g095950	PF11927.8	DUF3445	Protein of unknown function (DUF3445)
SS1G_02897	531	31	92	78	15.666	54.128	46.3746	1.78874	1.5657	-0.223042	hypothetical protein SS1G_02897	PF12223.8	DUF3602	Protein of unknown function (DUF3602)
SS1G_04814	659	26	100	168	10.5871	47.4071	80.4829	2.16279	2.92637	0.763579	predicted protein	PF12223.8	DUF3602	Protein of unknown function (DUF3602)
SS1G_00766	3562	80	148	471	6.02679	12.9807	41.7452	1.1069	2.79215	1.68525	hypothetical protein SS1G_00766	PF12396.8	DUF3659	Protein of unknown function (DUF3659)
SS1G_13129	1094	255	388	676	62.5479	110.801	195.078	0.824936	1.64102	0.816084	hypothetical protein SS1G_13129	PF12505.8	DUF3712	Protein of unknown function (DUF3712)
SS1G_00291	3129	65	125	221	5.5744	12.4805	22.298	1.16279	2.00003	0.837236	hypothetical protein SS1G_00291	PF14613.6	DUF4449
SS1G_03824	953	4	15	25	1.12631	4.91731	8.28184	2.12627	2.87835	0.752083	predicted protein	PF15496.6	DUF4646
SS1G_08873	616	64	8	13	27.8798	4.05731	6.66258	-2.78062	-2.06507	0.715557	hypothetical protein sscle_14g100180	PF04430.14	DUF498	Protein of unknown function (DUF498/DUF598)
SS1G_10247	687	136	41	155	53.1217	18.6447	71.2287	-1.51053	0.423155	1.93369	predicted protein	PF17233.2	DUF5308
SS1G_08477	827	1876	527	192	608.72	199.083	73.2952	-1.61241	-3.05399	-1.44158	hypothetical protein SS1G_08477	PF05603.12	DUF775	Protein of unknown function (DUF775)
SS1G_01029	1641	11	32	42	1.79876	6.09215	8.08017	1.75994	2.16738	0.407435	hypothetical protein SS1G_01029	PF07350.12	DUF1479	Protein of unknown function (DUF1479)	CL0029
SS1G_05894	1610	272	73	179	45.335	14.1653	35.1	-1.67826	-0.369153	1.30911	hypothetical protein SS1G_05894	PF08643.10	DUF1776	Fungal family of unknown function (DUF1776)	CL0063
SS1G_03465	1107	2119	507	1019	513.657	143.083	290.607	-1.84395	-0.821736	1.02221	hypothetical protein SS1G_03465	PF09351.10	DUF1993	Domain of unknown function (DUF1993)	CL0310
SS1G_07409	2465	80	17	30	8.7089	2.15457	3.84224	-2.01509	-1.18054	0.834545	hypothetical protein SS1G_07409	PF11274.8	DUF3074	Protein of unknown function (DUF3074)	CL0209
SS1G_00723	1307	73	31	19	14.9878	7.40995	4.58942	-1.01625	-1.7074	-0.691151	predicted protein	PF11917.8	DUF3435	Protein of unknown function (DUF3435)	CL0382
SS1G_05622	540	12	25	3	5.96318	14.4636	1.75391	1.27827	-1.76551	-3.04378	predicted protein	PF16297.5	DUF4939		CL0523
SS1G_08052	1609	37	45	14	6.17072	8.73746	2.74696	0.501776	-1.1676	-1.66938	hypothetical protein sscle_11g081310	PF16297.5	DUF4939		CL0523
SS1G_06547	1137	54	95	160	12.7445	26.1031	44.4262	1.03434	1.80153	0.76719	hypothetical protein SS1G_06547	PF04646.12	DUF604	Protein of unknown function, DUF604	CL0110
SS1G_02359	918	5	8	57	1.46156	2.72255	19.6025	0.897448	3.74546	2.84801	hypothetical protein SS1G_02359	PF05705.14	DUF829	Eukaryotic protein of unknown function (DUF829)	CL0028
SS1G_08909	1144	142	22	88	33.3083	6.00794	24.2849	-2.47094	-0.455822	2.01512	predicted protein	PF12855.7	Ecl1	ECL1/2/3 zinc binding proteins
SS1G_06058	2827	194	43	100	18.4148	4.75195	11.1674	-1.95427	-0.721563	1.23271	hypothetical protein SS1G_06058	PF12757.7	Eisosome1	Eisosome protein 1
SS1G_01002	924	18	8	36	5.22746	2.70487	12.3001	-0.950549	1.23449	2.18504	hypothetical protein SS1G_01002	PF13093.6	FTA4	Kinetochore complex Fta4 of Sim4 subunit, or CENP-50
SS1G_12083	4056	27	14	87	1.78631	1.07835	6.77175	-0.728156	1.92255	2.65071	hypothetical protein SS1G_12083	PF15979.5	Glyco_hydro_115
SS1G_02612	1836	346	67	195	50.5701	11.4007	33.5306	-2.14916	-0.592804	1.55636	hypothetical protein SS1G_02612	PF16862.5	Glyco_hydro_79C
SS1G_02620	1998	21	62	50	2.82042	9.69449	7.9005	1.78126	1.48603	-0.295223	hypothetical protein SS1G_02620	PF16862.5	Glyco_hydro_79C
SS1G_00036	350	195	567	79	149.505	506.109	71.2589	1.75925	-1.06906	-2.82831	Glucose-repressible protein Grg1	PF11034.8	Grg1	Glucose-repressible protein Grg1
SS1G_07237	922	28	0	6	8.14924	0.001	2.05447	-12.9925	-1.9879	11.0046	predicted protein	PF11034.8	Grg1	Glucose-repressible protein Grg1
SS1G_03889	977	11	46	35	3.02126	14.7093	11.3098	2.28351	1.90435	-0.379161	hypothetical protein SS1G_03889	PF06985.11	HET	Heterokaryon incompatibility protein (HET)
SS1G_09270	522	380	934	1876	195.345	558.992	1134.6	1.5168	2.53808	1.02128	hypothetical protein SS1G_09270	PF12296.8	HsbA	Hydrophobic surface binding protein A
SS1G_12217	690	34	86	136	13.2227	38.9384	62.2257	1.55818	2.23449	0.676316	hypothetical protein SS1G_12217	PF10241.9	KxDL	Uncharacterized conserved protein
SS1G_12316	1603	2	19	21	0.334801	3.70296	4.13586	3.4673	3.62681	0.159507	hypothetical protein SS1G_12316	PF08310.11	LGFP	LGFP repeat
SS1G_01996	2422	34	3	6	3.76699	0.386969	0.78209	-3.28312	-2.26801	1.01512	hypothetical protein SS1G_01996	PF06772.11	LtrA	Bacterial low temperature requirement A protein (LtrA)
SS1G_08893	647	412	98	111	170.877	47.3207	54.1625	-1.85241	-1.65759	0.194824	hypothetical protein SS1G_08893	PF01124.18	MAPEG	MAPEG (Membrane-Associated Proteins in Eicosanoid and Glutathione metabolism) family
SS1G_03601	1188	26	17	53	5.87282	4.47056	14.0844	-0.393601	1.26197	1.65558	hypothetical protein SS1G_03601	PF06991.11	MFAP1	Micro-fibrillar-associated protein 1 C-terminus
SS1G_12559	1218	1266	375	359	278.918	96.1862	93.0523	-1.53594	-1.58373	-0.0477892	hypothetical protein SS1G_12559	PF12829.7	Mhr1	Transcriptional regulation of mitochondrial recombination
SS1G_07945	347	30	82	65	23.1997	73.8267	59.1376	1.67004	1.34997	-0.320067	hypothetical protein SS1G_07945	PF10906.8	Mrx7	MIOREX complex component 7
SS1G_07206	583	40	2	19	18.4112	1.07174	10.2888	-4.10255	-0.839507	3.26305	predicted protein	PF03980.14	Nnf1	Nnf1
SS1G_11912	857	53	93	1352	16.5953	33.9025	498.053	1.03061	4.90745	3.87684	hypothetical protein SS1G_11912 (NEP2)	PF05630.11	NPP1	Necrosis inducing protein (NPP1)
SS1G_04743	696	133	37	80	51.2782	16.6082	36.2878	-1.62645	-0.498861	1.12759	hypothetical protein SS1G_04743	PF09791.9	Oxidored-like	Oxidoreductase-like protein, N-terminal
SS1G_11557	945	13	29	46	3.69149	9.58727	15.3676	1.37692	2.05762	0.680698	hypothetical protein SS1G_11557	PF15159.6	PIG-Y
SS1G_00050	3682	17	66	47	1.23895	5.60001	4.0299	2.17631	1.70162	-0.474688	predicted protein	PF04749.17	PLAC8	A_thal_Cys_rich: uncharacterized Cys-rich domain
SS1G_01632	588	100	39	16	45.6366	20.7213	8.59058	-1.13908	-2.40936	-1.27028	predicted protein	PF04749.17	PLAC8	A_thal_Cys_rich: uncharacterized Cys-rich domain
SS1G_10051	1664	454	392	1458	73.2138	73.5973	276.62	0.00753765	1.91772	1.91018	hypothetical protein sscle_01g003440	PF14027.6	Questin_oxidase
SS1G_10209	2631	33	84	48	3.36576	9.97441	5.7597	1.5673	0.775062	-0.792237	hypothetical protein SS1G_10209	PF10214.9	Rrn6	RNA polymerase I-specific transcription-initiation factor
SS1G_10341	1690	20	60	50	3.17566	11.0916	9.34035	1.80434	1.55642	-0.247917	hypothetical protein SS1G_10341	PF00856.28	SET	SET domain
SS1G_13534	3382	6	21	41	0.476067	1.93988	3.82728	2.02673	3.00708	0.980352	hypothetical protein SS1G_13534	PF08457.10	Sfi1	Sfi1 spindle body protein
SS1G_11257	2182	83	145	206	10.2074	20.7607	29.8052	1.02425	1.54595	0.521709	predicted protein	PF15477.6	SMAP	Small acidic protein family
SS1G_09163	850	182	31	47	57.457	11.3939	17.4566	-2.33422	-1.71871	0.61551	hypothetical protein SS1G_09163	PF12138.8	Spherulin4	Spherulation-specific family 4
SS1G_00889	1197	5	6	24	1.1209	1.56598	6.3299	0.482411	2.49753	2.01512	hypothetical protein SS1G_00889	PF02586.14	SRAP	SOS response associated peptidase (SRAP)
SS1G_00351	1476	120	322	215	21.8165	68.1551	45.9867	1.6434	1.0758	-0.567606	hypothetical protein SS1G_00351	PF05022.12	SRP40_C	SRP40, C-terminal domain
SS1G_04589	1086	90	831	627	22.2384	239.056	182.271	3.42623	3.03496	-0.391265	hypothetical protein SS1G_04589	PF05742.12	TANGO2	Transport and Golgi organisation 2
SS1G_11838	709	15	61	41	5.67721	26.879	18.2565	2.24322	1.68516	-0.558068	hypothetical protein SS1G_11838	PF11176.8	Tma16	Translation machinery-associated protein 16
SS1G_08292	1725	157	45	77	24.4231	8.1499	14.0923	-1.58339	-0.79334	0.790051	hypothetical protein SS1G_08292	PF10521.9	Tti2	Protein of unknown function (DUF2454)
SS1G_02910	334	0	17	5	0.001	15.9013	4.7261	13.9569	12.2064	-1.75042	hypothetical protein SS1G_02910	PF01977.16	UbiD	TIGR00148: UbiD family decarboxylases
SS1G_03373	1916	269	71	93	37.6744	11.5769	15.3238	-1.70234	-1.29781	0.404529	hypothetical protein SS1G_03373	PF01933.18	UPF0052	Uncharacterised protein family UPF0052
SS1G_11245	4741	61	139	151	3.45263	9.15954	10.0551	1.40758	1.54216	0.134581	hypothetical protein SS1G_11245	PF10441.9	Urb2	Urb2/Npa2 family
SS1G_13511	1057	68	10	25	17.2633	2.95566	7.46698	-2.54616	-1.20911	1.33705	predicted protein	PF10601.9	zf-LITAF-like	LITAF-like zinc ribbon domain
SS1G_10832	453	161	33	80	95.3713	22.7586	55.7534	-2.06715	-0.774495	1.29265	predicted protein	PF04419.14	4F5	4F5 protein family	CL0361
SS1G_04597	908	7	13	39	2.06872	4.47287	13.56	1.11246	2.71254	1.60008	hypothetical protein SS1G_04597	PF03061.22	4HBT	Thioesterase superfamily	CL0050
SS1G_03437	1103	97	67	234	23.5986	18.977	66.9761	-0.314447	1.50495	1.81939	hypothetical protein SS1G_03437	PF13622.6	4HBT_3		CL0050
SS1G_08838	6371	63	141	44	2.65352	6.91418	2.18034	1.38165	-0.283354	-1.665	hypothetical protein SS1G_08838	PF13401.6	AAA_22		CL0023
SS1G_11096	1580	135	278	509	22.928	54.9689	101.705	1.2615	2.1492	0.887698	hypothetical protein SS1G_11096	PF12697.7	Abhydrolase_6	alpha/beta hydrolase fold	CL0028
SS1G_00617	990	93	22	18	25.208	6.94251	5.74007	-1.86035	-2.13474	-0.274389	hypothetical protein SS1G_00617	PF12697.7	Abhydrolase_6		CL0028
SS1G_01406	1315	328	70	93	66.9327	16.6303	22.3273	-2.00889	-1.5839	0.424993	hypothetical protein SS1G_01406	PF12697.7	Abhydrolase_6		CL0028
SS1G_07096	775	56	100	138	19.3899	40.3113	56.2156	1.05588	1.53566	0.479786	hypothetical protein SS1G_07096	PF12697.7	Abhydrolase_6		CL0028
SS1G_08558	780	361	1028	716	124.195	411.744	289.8	1.72915	1.22245	-0.506691	hypothetical protein SS1G_08558	PF12697.7	Abhydrolase_6		CL0028
SS1G_08366	1265	44	67	202	9.33367	16.5468	50.4128	0.826034	2.43327	1.60724	hypothetical protein SS1G_08366	PF00583.25	Acetyltransf_1		CL0257
SS1G_01389	822	94	44	12	30.6864	16.7228	4.60881	-0.875781	-2.73513	-1.85935	hypothetical protein SS1G_01389	PF08787.11	Alginate_lyase2	Alginate lyase	CL0004
SS1G_07050	6134	81	62	209	3.54349	3.15774	10.7568	-0.166277	1.602	1.76828	hypothetical protein SS1G_07050	PF12796.7	Ank_2	Ankyrin repeat	CL0465
SS1G_00957	1526	468	273	105	82.2965	55.8904	21.7227	-0.558231	-1.92163	-1.36339	hypothetical protein SS1G_00957	PF00339.29	Arrestin_N	Arrestin (or S-antigen), N-terminal domain	CL0135
SS1G_13192	1860	20	38	58	2.88541	6.38263	9.84453	1.14538	1.77055	0.625171	hypothetical protein SS1G_13192	PF14269.6	Arylsulfotran_2	Arylsulfotransferase (ASST)	CL0186
SS1G_05195	1378	32	96	60	6.23148	21.7646	13.7462	1.80434	1.14138	-0.662954	hypothetical protein SS1G_05195	PF00144.24	Beta-lactamase	Beta-lactamase	CL0013
SS1G_05235	2076	38	59	92	4.91186	8.87879	13.9907	0.854092	1.51013	0.656036	hypothetical protein SS1G_05235	PF00651.31	BTB	BTB/POZ domain	CL0033
SS1G_12102	1594	42	6	18	7.07052	1.17596	3.56504	-2.58798	-0.987899	1.60008	predicted protein	PF00651.31	BTB	BTB/POZ domain	CL0033
SS1G_01790	857	26	65	83	8.14109	23.6953	30.5757	1.5413	1.90909	0.367789	predicted protein	PF07716.15	bZIP_2		CL0018
SS1G_14323	3845	15	45	28	1.04685	3.65633	2.29901	1.80434	1.13496	-0.669381	hypothetical protein SS1G_14323	PF00168.30	C2	C2 domain	CL0154
SS1G_04835	1578	32	44	77	5.44168	8.71113	15.4051	0.678808	1.50128	0.822472	hypothetical protein SS1G_04835	PF16679.5	CDT1_C		CL0123
SS1G_13179	989	27	70	31	7.32584	22.1121	9.89567	1.59377	0.433803	-1.15997	hypothetical protein SS1G_13179	PF14617.6	CMS1	DEAD/DEAH box helicase	CL0023
SS1G_11236	1224	107	196	258	23.4581	50.0269	66.5454	1.09262	1.50425	0.411635	hypothetical protein SS1G_11236	PF02492.19	cobW	CobW/HypB/UreG, nucleotide-binding domain	CL0023
SS1G_04032	589	31	5	20	14.1233	2.65206	10.72	-2.41289	-0.397774	2.01512	predicted protein	PF05347.15	Complex1_LYR	Complex 1 protein (LYR family)	CL0491
SS1G_03843	516	7181	1880	3391	3734.44	1138.25	2074.71	-1.71408	-0.84798	0.866096	hypothetical protein SS1G_03843	PF07883.11	Cupin_2	Cupin domain	CL0029
SS1G_06228	471	21	12	82	11.9643	7.95956	54.9633	-0.587979	2.19973	2.78771	hypothetical protein SS1G_06228	PF06172.11	Cupin_5	Cupin superfamily (DUF985)	CL0029
SS1G_01653	1096	40	90	101	9.79354	25.6543	29.0931	1.3893	1.57078	0.181476	hypothetical protein SS1G_01653	PF13816.6	Dehydratase_hem		CL0032
SS1G_09620	990	606	9963	8381	164.258	3144.01	2672.64	4.25857	4.02423	-0.23434	hypothetical protein SS1G_09620	PF01965.24	DJ-1_PfpI	DJ-1/PfpI family	CL0014
SS1G_03393	915	82	88	549	24.0482	30.0463	189.422	0.321256	2.9776	2.65635	hypothetical protein SS1G_03393	PF06249.12	EutQ	Ethanolamine utilisation protein EutQ	CL0029
SS1G_03097	2922	13	18	41	1.19386	1.92451	4.42979	0.688862	1.89161	1.20274	hypothetical protein SS1G_03097	PF00646.33	F-box	F-box domain	CL0271
SS1G_13981	999	87	363	307	23.3692	113.519	97.0181	2.28026	2.05365	-0.226613	hypothetical protein SS1G_13981	PF12937.7	F-box-like	F-box domain	CL0271
SS1G_08149	2226	65	116	158	7.83571	16.2803	22.4084	1.05499	1.51591	0.460917	hypothetical protein SS1G_08149	PF12709.7	Fungal_TACC	Fungal Transforming acidic coiled-coil (TACC) proteins	CL0679
SS1G_02005	2417	9	33	51	0.999208	4.26546	6.66152	2.09385	2.73699	0.643149	hypothetical protein SS1G_02005	PF11951.8	Fungal_trans_2	Fungal specific transcription factor domain	CL0507
SS1G_04969	2924	1261	3203	1876	115.725	342.222	202.551	1.56423	0.807585	-0.756646	hypothetical protein SS1G_04969	PF13632.6	Glyco_trans_2_3	Glycosyl transferase family 2	CL0110
SS1G_05913	2852	131	498	1619	12.3257	54.5518	179.216	2.14596	3.86196	1.716	hypothetical protein SS1G_05913	PF13632.6	Glyco_trans_2_3	Glycosyl transferase family 2	CL0110
SS1G_12938	1999	1853	2389	5395	248.744	373.364	852.037	0.58592	1.77625	1.19033	hypothetical protein SS1G_12938	PF10342.9	GPI-anchored	Developmentally Regulated MAPK Interacting Protein	CL0159
SS1G_14077	790	569	144	137	193.275	56.9462	54.7486	-1.76298	-1.81976	-0.0567754	hypothetical protein SS1G_14077	PF13417.6	GST_N_3	Glutathione S-transferase, C-terminal domain	CL0172
SS1G_08210	927	1005	256	367	290.922	86.2758	124.987	-1.7536	-1.21885	0.534754	hypothetical protein SS1G_08210	PF13417.6	GST_N_3		CL0172
SS1G_12898	840	679	168	78	216.911	62.4826	29.3154	-1.79557	-2.88737	-1.0918	hypothetical protein SS1G_12898	PF12710.7	HAD		CL0137
SS1G_02826	2317	46	29	82	5.32748	3.91022	11.1729	-0.446205	1.06848	1.51469	hypothetical protein sscle_04g037430	PF13419.6	HAD_2	HAD_type_II: haloacid dehalogenase, type II	CL0137
SS1G_02406	1010	271	52	139	72.0009	16.0846	43.4483	-2.16233	-0.728714	1.43362	hypothetical protein SS1G_02406	PF00300.22	His_Phos_1	Phosphoglycerate mutase family	CL0071
SS1G_06470	1281	309	23	47	64.7291	5.60929	11.5832	-3.52852	-2.48238	1.04614	predicted protein	PF11160.8	Hva1_TUDOR	Hypervirulence associated proteins TUDOR domain	CL0049
SS1G_06493	1488	4592	548	918	828.112	115.055	194.769	-2.8475	-2.08806	0.759436	hypothetical protein SS1G_06493	PF13344.6	Hydrolase_6	CECR5: HAD hydrolase, TIGR01456 family	CL0137
SS1G_00983	1604	226	28	88	37.8089	5.45359	17.3204	-2.79345	-1.12625	1.66719	hypothetical protein SS1G_00983	PF13242.6	Hydrolase_like	HAD-SF-IIA: HAD hydrolase, family IIA	CL0137
SS1G_05082	1425	173	725	607	32.5778	158.947	134.479	2.28659	2.04542	-0.241167	hypothetical protein SS1G_05082	PF13418.6	Kelch_4	Kelch motif; Galactose oxidase, central domain	CL0186
SS1G_06766	2882	73	16	59	6.79703	1.73442	6.46305	-1.97045	-0.0726877	1.89776	hypothetical protein SS1G_06766	PF13418.6	Kelch_4	Kelch motif; Galactose oxidase, central domain	CL0186
SS1G_00772	2184	223	801	298	27.3995	114.58	43.0768	2.06413	0.652762	-1.41137	hypothetical protein SS1G_00772	PF01476.20	LysM	LysM domain	CL0187
SS1G_10822	495	41	17	54	22.2264	10.7293	34.4404	-1.05071	0.631829	1.68254	hypothetical protein SS1G_10822	PF10294.9	Methyltransf_16	Lysine methyltransferase	CL0063
SS1G_07505	970	53	84	173	14.662	27.0543	56.3059	0.883773	1.9412	1.05743	hypothetical protein SS1G_07505	PF13649.6	Methyltransf_25	Methyltransferase domain	CL0063
SS1G_11334	831	48	11	27	15.5	4.13543	10.2575	-1.90615	-0.595581	1.31057	hypothetical protein SS1G_11334	PF13649.6	Methyltransf_25	Methyltransferase domain	CL0063
SS1G_04617	1247	31	78	69	6.67091	19.5415	17.4688	1.55058	1.38882	-0.16176	hypothetical protein SS1G_04617	PF02598.17	Methyltrn_RNA_3	Putative RNA methyltransferase	CL0098
SS1G_01832	798	2539	650	297	853.788	254.472	117.499	-1.74637	-2.86123	-1.11486	hypothetical protein SS1G_01832	PF13460.6	NAD_binding_10	NAD(P)H-binding	CL0063
SS1G_08563	853	1082	539	203	340.383	197.41	75.1323	-0.785967	-2.17966	-1.39369	hypothetical protein SS1G_08563	PF13460.6	NAD_binding_10	NAD(P)H-binding	CL0063
SS1G_07059	1089	60	13	41	14.7847	3.72945	11.886	-1.98707	-0.314845	1.67223	hypothetical protein SS1G_07059	PF13460.6	NAD_binding_10	NAD(P)H-binding	CL0063
SS1G_00424	2016	27	5	35	3.59388	0.774834	5.48097	-2.21358	0.608889	2.82247	hypothetical protein SS1G_00424	PF13450.6	NAD_binding_8	NAD(P)H-binding	CL0063
SS1G_13847	964	27	8	2	7.51583	2.59264	0.654987	-1.53551	-3.52039	-1.98488	hypothetical protein SS1G_13847	PF05368.13	NmrA	NmrA-like family	CL0063
SS1G_05291	1217	53	35	696	11.6863	8.98476	180.55	-0.379261	3.94952	4.32878	hypothetical protein SS1G_05291	PF05368.13	NmrA	NmrA-like family	CL0063
SS1G_12301	1204	320	91	140	71.3204	23.6126	36.7097	-1.59476	-0.958151	0.636606	hypothetical protein SS1G_12301	PF05368.13	NmrA	NmrA-like family	CL0063
SS1G_03269	618	27	79	102	11.7237	39.9363	52.1065	1.76827	2.15203	0.383762	hypothetical protein SS1G_03269	PF04248.12	NTP_transf_9	Domain of unknown function (DUF427)	CL0080
SS1G_05244	1593	11	46	28	1.85296	9.02134	5.54909	2.28351	1.58242	-0.701089	predicted protein	PF10250.9	O-FucT	GDP-fucose protein O-fucosyltransferase	CL0113
SS1G_08840	876	42	8	8	12.8658	2.85309	2.88314	-2.17294	-2.15782	0.0151175	hypothetical protein SS1G_08840	PF10250.9	O-FucT	GDP-fucose protein O-fucosyltransferase	CL0113
SS1G_07650	2474	52	20	60	5.64019	2.52557	7.65652	-1.15914	0.440945	1.60008	hypothetical protein SS1G_07650	PF00169.29	PH		CL0266
SS1G_04661	964	242	381	742	67.3641	123.474	243	0.87416	1.85091	0.976746	hypothetical protein SS1G_04661	PF05721.13	PhyH	Phytanoyl-CoA dioxygenase (PhyH)	CL0029
SS1G_05232	1037	180	69	200	46.5783	20.7874	60.8879	-1.16395	0.386497	1.55045	hypothetical protein SS1G_05232	PF05721.13	PhyH	Phytanoyl-CoA dioxygenase (PhyH)	CL0029
SS1G_10172	1596	664	215	1016	111.641	42.0857	200.974	-1.40747	0.848139	2.25561	hypothetical protein SS1G_10172	PF13449.6	Phytase-like		CL0186
SS1G_05448	717	121	266	362	45.2852	115.902	159.393	1.3558	1.81548	0.459681	hypothetical protein SS1G_05448	PF04707.14	PRELI	PRELI-like family	CL0209
SS1G_00260	2711	58	188	164	5.74101	21.6649	19.0983	1.91598	1.73406	-0.181919	hypothetical protein SS1G_00260	PF08167.12	RIX1		CL0020
SS1G_03823	1944	14	52	41	1.93251	8.35672	6.65836	2.11246	1.78469	-0.32777	predicted protein	PF09414.10	RNA_ligase	RNA ligase	CL0078
SS1G_06040	969	253	43	47	70.0627	13.8635	15.3128	-2.33735	-2.19391	0.143442	predicted protein	PF10340.9	Say1_Mug180	alpha/beta hydrolase fold	CL0028
SS1G_02756	720	15	83	133	5.59048	36.0143	58.3175	2.68753	3.38289	0.695361	hypothetical protein SS1G_02756	PF18142.1	SLATT_fungal	SMODS and SLOG-associating 2TM effector domain	CL0676
SS1G_00329	1127	250	68	152	59.5259	18.8501	42.5794	-1.65895	-0.483363	1.17558	predicted protein	PF10451.9	Stn1		CL0021
SS1G_09110	1001	0	23	17	0.001	7.17832	5.3616	12.8094	12.3884	-0.420982	hypothetical protein SS1G_09110	PF00314.17	Thaumatin	Thaumatin family	CL0293
SS1G_00842	1047	20	54	32	5.12594	16.113	9.64902	1.65234	0.912566	-0.73977	hypothetical protein SS1G_00842	PF13374.6	TPR_10		CL0020
SS1G_12925	1756	1532	181	248	234.112	32.202	44.5869	-2.86198	-2.39251	0.469468	hypothetical protein SS1G_12925	PF11470.8	TUG-UBL1	GLUT4 regulating protein TUG	CL0072
SS1G_04810	1743	37	70	117	5.69632	12.5467	21.1918	1.13921	1.89541	0.756199	hypothetical protein sscle_02g013900	PF11754.8	Velvet	Velvet factor	CL0159
SS1G_09028	2424	53	26	84	5.86723	3.35096	10.9402	-0.808104	0.898891	1.707	hypothetical protein SS1G_09028	PF08700.11	Vps51	Vps51/Vps67	CL0295
SS1G_05620	962	29	55	7	8.08934	17.8614	2.29722	1.14276	-1.81613	-2.95889	---NA---	PF00098.23	zf-CCHC	Zinc knuckle	CL0511
SS1G_03214	1584	10	60	36	1.69408	11.8338	7.17509	2.80434	2.08249	-0.721848	predicted protein
SS1G_09797	1182	51	142	102	11.5782	37.5318	27.2435	1.6967	1.23449	-0.462204	hypothetical protein SS1G_09797
SS1G_01948	458	22	2	0	12.8898	1.36425	0.001	-3.24006	-13.6539	-10.4139	predicted protein
SS1G_12513	1641	63	125	290	10.302	23.7974	55.7917	1.20788	2.43712	1.22924	hypothetical protein SS1G_12513
SS1G_00147	2458	435	88	242	47.4895	11.1848	31.0823	-2.08606	-0.611515	1.47455	hypothetical protein SS1G_00147
SS1G_05201	597	19	14	49	8.54023	7.32627	25.912	-0.221196	1.60128	1.82247	hypothetical protein SS1G_05201
SS1G_11764	1038	102	16	25	26.369	4.81561	7.60366	-2.45305	-1.79408	0.658974	hypothetical protein SS1G_11764
SS1G_00008	1456	17	43	42	3.13312	9.22648	9.10684	1.55818	1.53935	-0.0188298	hypothetical protein SS1G_00008
SS1G_00038	997	320	384	132	86.1281	120.328	41.7983	0.482411	-1.04304	-1.52545	hypothetical protein SS1G_00038
SS1G_00046	249	176	33	51	189.672	41.4041	64.6622	-2.19566	-1.55251	0.643149	hypothetical protein SS1G_00046
SS1G_00075	576	72	103	174	33.5429	55.8655	95.3689	0.735952	1.50751	0.771561	hypothetical protein SS1G_00075
SS1G_00095	1179	1915	2615	4983	435.858	692.926	1334.31	0.668843	1.61416	0.945321	hypothetical protein SS1G_00095
SS1G_00105	449	128	138	37	76.4986	96.02	26.0157	0.327901	-1.55605	-1.88395	predicted protein
SS1G_00126	454	312	134	76	184.412	92.21	52.8491	-0.999937	-1.80298	-0.803044	predicted protein
SS1G_00136	285	9	37	18	8.47399	40.5589	19.9392	2.2589	1.23449	-1.02441	hypothetical protein
SS1G_00150	766	18	0	7	6.30571	0.001	2.88502	-12.6224	-1.12808	11.4944	hypothetical protein
SS1G_00200	189	19	49	32	26.9763	80.9959	53.4525	1.58616	0.986566	-0.599592	predicted protein
SS1G_00308	774	62	15	28	21.4952	6.05451	11.4208	-1.82793	-0.912348	0.915582	predicted protein
SS1G_00339	846	44	7	18	13.9564	2.58498	6.7171	-2.4327	-1.05501	1.37769	predicted protein
SS1G_00353	1447	527	368	139	97.731	79.4526	30.3268	-0.298721	-1.68822	-1.3895	hypothetical protein SS1G_00353
SS1G_00357	413	51	153	171	33.1368	115.737	130.715	1.80434	1.97992	0.175582	hypothetical protein
SS1G_00371	409	223	63	103	146.309	48.1223	79.5049	-1.60424	-0.879906	0.724338	hypothetical protein
SS1G_00394	2996	193	52	89	17.2864	5.42239	9.37838	-1.67264	-0.88223	0.790411	hypothetical protein SS1G_00394
SS1G_00416	1497	5	7	22	0.896269	1.46085	4.6396	0.704803	2.372	1.66719	hypothetical protein sscle_03g027310
SS1G_00434	464	54	27	100	31.2296	18.1792	68.0396	-0.780624	1.12346	1.90409	hypothetical protein SS1G_00434
SS1G_00441	732	23	67	65	8.43154	28.5952	28.0338	1.7619	1.7333	-0.0286038	predicted protein
SS1G_00442	1351	22	89	89	4.36976	20.5809	20.7977	2.23568	2.2508	0.0151175	---NA---
SS1G_00448	431	20	0	0	12.4521	0.001	0.001	-13.6041	-13.6041	#N/A	predicted protein
SS1G_00470	1410	2314	694	633	440.387	153.769	141.731	-1.51801	-1.63562	-0.117613	predicted protein
SS1G_00474	1073	249	492	605	62.2716	143.25	178.006	1.20189	1.51528	0.313394	hypothetical protein SS1G_00474
SS1G_00513	1587	2146	1207	468	362.863	237.607	93.0998	-0.610848	-1.96258	-1.35173	hypothetical protein SS1G_00513
SS1G_00584	198	27	3	11	36.5922	4.73353	17.5391	-2.95055	-1.06096	1.88959	hypothetical protein
SS1G_00614	2347	13	58	52	1.48635	7.72047	6.99472	2.37692	2.23449	-0.142424	predicted protein
SS1G_00620	350	10	34	26	7.66694	30.3487	23.4523	1.98491	1.61301	-0.371906	hypothetical protein
SS1G_00670	864	59	28	83	18.3243	10.1245	30.328	-0.855912	0.72689	1.5828	predicted protein
SS1G_00705	1091	184	39	117	45.2567	11.1678	33.8564	-2.01878	-0.418703	1.60008	hypothetical protein
SS1G_00735	479	6061	1025	623	3395.46	668.525	410.613	-2.34456	-3.04776	-0.703202	predicted protein
SS1G_00744	636	471	137	140	198.726	67.2965	69.4945	-1.56217	-1.51581	0.0463685	predicted protein
SS1G_00757	549	25	1	14	12.2196	0.569058	8.05073	-4.42448	-0.602007	3.82247	predicted protein
SS1G_00761	727	711	146	622	262.437	62.7404	270.107	-2.0645	0.0415589	2.10606	hypothetical protein
SS1G_00763	931	200	39	245	57.6462	13.0871	83.0799	-2.13908	0.527276	2.66635	predicted protein
SS1G_00764	3026	73	15	61	6.47357	1.54864	6.36415	-2.06356	-0.0245934	2.03896	hypothetical protein SS1G_00764
SS1G_00843	702	3	9	19	1.14676	4.00529	8.54469	1.80434	2.89746	1.09312	hypothetical protein SS1G_00843
SS1G_00849	512	2199	922	267	1152.51	562.587	164.635	-1.03463	-2.80744	-1.77281	hypothetical protein SS1G_00849
SS1G_00868	342	95	767	432	74.5397	700.645	398.784	3.2326	2.41953	-0.813078	hypothetical protein
SS1G_00872	867	19	813	635	5.88064	292.955	231.225	5.63856	5.29718	-0.341381	predicted protein
SS1G_00996	959	3	19	12	0.839446	6.18962	3.95041	2.88234	2.23449	-0.647847	predicted protein
SS1G_01010	2342	30	2	9	3.43736	0.266792	1.21321	-3.68751	-1.50247	2.18504	hypothetical protein SS1G_01010
SS1G_01057	393	19	50	50	12.9733	39.7472	40.1659	1.6153	1.63042	0.0151175	hypothetical protein sscle_03g022400
SS1G_01082	1091	14	97	68	3.44345	27.7764	19.6772	3.01193	2.5146	-0.497332	predicted protein
SS1G_01110	1795	4	37	6	0.597979	6.43971	1.05528	3.42883	0.819456	-2.60937	predicted protein
SS1G_01306	1612	5	33	52	0.832329	6.39555	10.184	2.94184	3.61301	0.671163	hypothetical protein SS1G_01306
SS1G_01330	2053	89	26	34	11.633	3.95652	5.22841	-1.55592	-1.15378	0.402141	hypothetical protein SS1G_01330
SS1G_01384	1724	7	10	30	1.08956	1.81214	5.49369	0.733949	2.33403	1.60008	hypothetical protein SS1G_01384
SS1G_01387	629	16	25	39	6.82589	12.417	19.5746	0.863232	1.5199	0.656664	predicted protein
SS1G_01400	1087	14	6	0	3.45612	1.72445	0.001	-1.00302	-11.7549	-10.7519	predicted protein
SS1G_01424	755	127	27	41	45.1385	11.1724	17.1442	-2.01442	-1.39664	0.617782	predicted protein
SS1G_01556	833	22	54	88	7.08709	20.2525	33.3517	1.51483	2.23449	0.719662	hypothetical protein SS1G_01556
SS1G_01583	792	70	3	19	23.7172	1.18338	7.5737	-4.32494	-1.64686	2.67808	hypothetical protein SS1G_01583
SS1G_01750	1591	90	127	248	15.1797	24.9381	49.2109	0.716208	1.69684	0.980629	predicted protein
SS1G_01783	747	0	12	11	0.001	5.01868	4.64892	12.2931	12.1827	-0.110413	predicted protein
SS1G_01958	648	97	45	28	40.1686	21.6953	13.6415	-0.888683	-1.55806	-0.669381	predicted protein
SS1G_01980	1640	2934	511	549	480.072	97.3433	105.684	-2.3021	-2.1835	0.1186	hypothetical protein SS1G_01980
SS1G_02001	931	6	10	27	1.72939	3.35567	9.15575	0.956342	2.40442	1.44808	predicted protein
SS1G_02046	171	56	17	43	87.8784	31.0586	79.3875	-1.50052	-0.146596	1.35392	predicted protein
SS1G_02053	1486	20	36	63	3.61161	7.56855	13.3845	1.06737	1.88985	0.822472	predicted protein
SS1G_02236	405	44	66	110	29.1533	50.9117	85.7467	0.804339	1.55642	0.752083	predicted protein
SS1G_02244	718	30	1	1	11.2121	0.435115	0.439699	-4.68751	-4.6724	0.0151175	predicted protein
SS1G_02245	882	1738	659	432	528.775	233.424	154.63	-1.1797	-1.77383	-0.59413	hypothetical protein SS1G_02245
SS1G_02249	1108	1722	557	258	417.046	157.052	73.5123	-1.40896	-2.50415	-1.09519	hypothetical protein SS1G_02249
SS1G_02261	2519	54	7	28	5.75249	0.868158	3.50921	-2.72816	-0.713039	2.01512	predicted protein
SS1G_02329	2744	356	1402	4661	34.8142	159.622	536.259	2.19691	3.94518	1.74827	predicted protein
SS1G_02331	1649	707	2818	10519	115.051	533.887	2013.88	2.21427	4.12964	1.91537	hypothetical protein SS1G_02331
SS1G_02380	623	144	22	59	62.0247	11.0322	29.8981	-2.49112	-1.05279	1.43833	predicted protein
SS1G_02425	1149	80	14	35	18.6836	3.8066	9.61674	-2.2952	-0.958151	1.33705	predicted protein
SS1G_02456	1818	4	21	13	0.590413	3.60873	2.25751	2.61169	1.93493	-0.67676	hypothetical protein SS1G_02456
SS1G_02470	3723	70	50	141	5.04539	4.19571	11.9566	-0.266051	1.24476	1.51081	predicted protein
SS1G_02521	555	61	26	81	29.4935	14.6356	46.0757	-1.01092	0.643606	1.65453	hypothetical protein SS1G_02521
SS1G_02632	3006	79	125	239	7.05226	12.9912	25.1009	0.88138	1.83158	0.9502	hypothetical protein SS1G_02632
SS1G_02692	2583	15	0	4	1.55832	0.001	0.488895	-10.6058	-1.6724	8.93338	predicted protein
SS1G_02704	488	41	59	100	22.5452	37.7712	64.6934	0.744467	1.5208	0.776331	predicted protein
SS1G_02730	1588	21	66	42	3.54862	12.9844	8.34985	1.87145	1.23449	-0.636959	hypothetical protein SS1G_02730
SS1G_02812	2092	73	10	18	9.36378	1.49337	2.71638	-2.64852	-1.78541	0.863114	predicted protein
SS1G_02880	225	3	10	26	3.57791	13.885	36.4813	1.95634	3.34997	1.39363	predicted protein
SS1G_02883	3179	10	52	26	0.844111	5.11025	2.58204	2.59789	1.61301	-0.984882	predicted protein
SS1G_02973	177	0	3	13	0.001	5.29513	23.1873	12.3705	14.501	2.13059	predicted protein
SS1G_02995	1196	1467	528	277	329.146	137.921	73.1187	-1.25488	-2.17042	-0.915534	hypothetical protein SS1G_02995
SS1G_03105	483	244	16	102	135.56	10.3491	66.6704	-3.71136	-1.02382	2.68754	predicted protein
SS1G_03163	231	11	19	34	12.7782	25.6963	46.4672	1.00787	1.86253	0.854653	hypothetical protein SS1G_03163
SS1G_03223	501	0	12	17	0.001	7.48294	10.7125	12.8694	13.387	0.517618	predicted protein
SS1G_03229	1589	60	17	51	10.1325	3.34237	10.1327	-1.60005	2.85801e-05	1.60008	predicted protein
SS1G_03263	660	0	23	15	0.001	10.8871	7.17509	13.4103	12.8088	-0.601554	predicted protein
SS1G_03264	1130	15	40	15	3.56207	11.0589	4.19076	1.63441	0.234494	-1.39992	predicted protein
SS1G_03298	1523	29	14	46	5.10962	2.87182	9.53537	-0.83125	0.900075	1.73132	hypothetical protein SS1G_03298
SS1G_03334	240	2	17	10	2.23619	22.1292	13.1543	3.30684	2.55642	-0.750417	hypothetical protein sscle_07g057400
SS1G_03344	1449	10	30	33	1.85192	6.46818	7.18994	1.80434	1.95696	0.152621	hypothetical protein SS1G_03344
SS1G_03367	1646	8	8	28	1.30422	1.51841	5.37042	0.219376	2.04185	1.82247	hypothetical protein SS1G_03367
SS1G_03396	1276	16	19	41	3.3648	4.65192	10.1441	0.467304	1.59205	1.12474	predicted protein
SS1G_03459	1158	140	28	69	32.4421	7.55403	18.8114	-2.10255	-0.786265	1.31629	predicted protein
SS1G_03481	1165	23	2	5	5.29776	0.536331	1.35495	-3.30419	-1.96714	1.33705	predicted protein
SS1G_03502	1361	6	16	32	1.183	3.67275	7.42287	1.63441	2.64953	1.01512	predicted protein
SS1G_03543	372	57	109	201	41.1171	91.5403	170.582	1.15467	2.05266	0.897985	hypothetical protein SS1G_03543
SS1G_03562	474	19	63	51	10.7564	41.5232	33.9681	1.94873	1.65899	-0.289737	predicted protein
SS1G_03655	386	38	17	9	26.4172	13.7591	7.36097	-0.941088	-1.84351	-0.90242	predicted protein
SS1G_03683	2247	44	150	361	5.2546	20.8553	50.7205	1.98876	3.27092	1.28215	predicted protein
SS1G_03687	1548	68	155	188	11.7877	31.2817	38.3413	1.40804	1.70162	0.293582	hypothetical protein SS1G_03687
SS1G_03692	898	9034	3560	1763	2699.57	1238.52	619.806	-1.12411	-2.12284	-0.998727	predicted protein
SS1G_03791	848	59	2	29	18.6701	0.736823	10.7965	-4.66327	-0.790168	3.8731	predicted protein
SS1G_03863	2425	15	78	34	1.65985	10.0487	4.42636	2.59789	1.41507	-1.18282	predicted protein
SS1G_03885	1028	29	2	10	7.56998	0.607807	3.07105	-3.6386	-1.30156	2.33705	hypothetical protein SS1G_03885
SS1G_03942	180	7	8	25	10.4356	13.885	43.8478	0.412021	2.071	1.65897	predicted protein
SS1G_03979	2453	14	10	0	1.53151	1.2736	0.001	-0.266051	-10.5807	-10.3147	predicted protein
SS1G_04080	1047	24	16	46	6.15113	4.77422	13.8705	-0.365586	1.17309	1.53868	hypothetical protein SS1G_04080
SS1G_04176	809	277	93	268	91.8801	35.914	104.584	-1.35521	0.186841	1.54205	hypothetical protein SS1G_04176
SS1G_04178	1877	28	3	11	4.00298	0.499328	1.85016	-3.00302	-1.11343	1.88959	hypothetical protein SS1G_04178
SS1G_04186	1678	99	321	330	15.8319	59.7643	62.0872	1.91645	1.97146	0.0550103	hypothetical protein SS1G_04186
SS1G_04213	5389	653	1639	2042	32.5159	95.0167	119.626	1.54704	1.87932	0.332285	hypothetical protein SS1G_04213
SS1G_04216	1765	60	190	150	9.12214	33.6309	26.8304	1.88234	1.55642	-0.325919	hypothetical protein SS1G_04216
SS1G_04286	1251	32	69	581	6.86409	17.2314	146.622	1.3279	4.41689	3.08899	hypothetical protein SS1G_04286
SS1G_04324	503	17	1	2	9.06924	0.621099	1.25528	-3.86809	-2.85297	1.01512	predicted protein
SS1G_04352	999	52	11	15	13.9678	3.43998	4.7403	-2.02163	-1.55906	0.462577	hypothetical protein SS1G_04352
SS1G_04363	933	0	13	8	0.001	4.35302	2.707	12.0878	11.4025	-0.685322	predicted protein
SS1G_04376	396	319	4544	4352	216.165	3584.86	3469.55	4.05171	4.00454	-0.0471667	predicted protein
SS1G_04382	666	210	99	53	84.6126	46.4398	25.1236	-0.865513	-1.75183	-0.886319	predicted protein
SS1G_04393	683	51	159	259	20.0373	72.7286	119.718	1.85983	2.57888	0.719043	predicted protein
SS1G_04473	2765	118	389	426	11.4519	43.9525	48.6401	1.94036	2.08656	0.146201	hypothetical protein SS1G_04473
SS1G_04482	623	22	0	12	9.47599	0.001	6.08097	-13.2101	-0.639975	12.5701	predicted protein
SS1G_04519	802	3381	1146	641	1131.26	446.415	252.327	-1.34147	-2.16456	-0.823093	predicted protein
SS1G_04535	537	69	20	46	34.4798	11.6355	27.0435	-1.56722	-0.350469	1.21675	hypothetical protein SS1G_04535
SS1G_04570	1863	13	35	43	1.87249	5.86927	7.28678	1.64822	1.96032	0.312099	hypothetical protein SS1G_04570
SS1G_04583	412	42	12	42	27.3553	9.09941	32.1834	-1.58798	0.234494	1.82247	predicted protein
SS1G_04605	2265	78	224	204	9.24095	30.8965	28.4342	1.74133	1.62152	-0.119812	hypothetical protein SS1G_04605
SS1G_04689	763	18	18	1	6.3305	7.37016	0.413766	0.219376	-3.93543	-4.15481	predicted protein
SS1G_04760	562	4933	741	1977	2355.4	411.918	1110.58	-2.51554	-1.08466	1.43088	predicted protein
SS1G_04762	217	6	6	25	7.41962	8.63815	36.3714	0.219376	2.29339	2.07401	hypothetical protein SS1G_04762
SS1G_04927	2253	28	1	8	3.33493	0.138665	1.12101	-4.58798	-1.57286	3.01512	predicted protein
SS1G_04982	206	0	12	5	0.001	18.1988	7.66271	14.1516	12.9036	-1.24792	predicted protein
SS1G_05027	465	2	84	184	1.15416	56.4359	124.924	5.61169	6.75806	1.14636	predicted protein
SS1G_05105	981	12	115	174	3.28248	36.6233	55.9964	3.4799	4.09247	0.612571	hypothetical protein SS1G_05105
SS1G_05141	726	78	239	406	28.8302	102.847	176.551	1.83484	2.61443	0.779587	predicted protein
SS1G_05231	699	0	11	6	0.001	4.91637	2.7099	12.2634	11.404	-0.859352	predicted protein
SS1G_05260	943	44	6	15	12.5208	1.98778	5.0218	-2.65509	-1.31805	1.33705	predicted protein
SS1G_05294	1349	101	303	152	20.0909	70.1713	35.5723	1.80434	0.82421	-0.980129	hypothetical protein SS1G_05294
SS1G_05325	463	14	29	42	8.11404	19.568	28.6384	1.27	1.81946	0.549454	hypothetical protein SS1G_05325
SS1G_05356	1004	102	180	254	27.2619	56.0103	79.8693	1.0388	1.55075	0.511949	predicted protein
SS1G_05362	866	16	3	28	4.95784	1.08226	10.2075	-2.19566	1.04185	3.23751	predicted protein
SS1G_05372	813	14	22	50	4.62091	8.45398	19.416	0.871453	2.071	1.19954	hypothetical protein SS1G_05372
SS1G_05396	618	65	30	12	28.2238	15.1657	6.13017	-0.896101	-2.20291	-1.30681	predicted protein
SS1G_05409	925	31	6	23	8.99311	2.02646	7.84993	-2.14986	-0.196141	1.95372	predicted protein
SS1G_05422	817	24	3	6	7.88278	1.14717	2.31851	-2.78062	-1.76551	1.01512	hypothetical protein SS1G_05422
SS1G_05463	1153	243	56	102	56.5545	15.1736	27.9287	-1.89808	-1.01789	0.880188	hypothetical protein SS1G_05463
SS1G_05509	1029	13	23	41	3.39014	6.98299	12.5791	1.0425	1.89161	0.849108	predicted protein
SS1G_05510	828	94	28	52	30.4641	10.5647	19.8268	-1.52786	-0.619655	0.908202	hypothetical protein SS1G_05510
SS1G_05577	216	33	6	24	40.9968	8.67814	35.0782	-2.24006	-0.224938	2.01512	predicted protein
SS1G_05599	261	12	93	103	12.3376	111.32	124.588	3.17357	3.33603	0.162459	hypothetical protein sscle_08g067930
SS1G_05640	686	20	49	83	7.82341	22.3152	38.1974	1.51216	2.28761	0.775447	predicted protein
SS1G_05731	525	140	481	759	71.5581	286.23	456.417	1.99999	2.67317	0.673181	hypothetical protein SS1G_05731
SS1G_05739	1469	61	42	12	11.1429	8.93216	2.57893	-0.319044	-2.11128	-1.79224	predicted protein
SS1G_05794	999	12222	2095	1123	3282.97	655.16	354.89	-2.32508	-3.20956	-0.884475	hypothetical protein SS1G_05794
SS1G_05876	1428	1524	136	196	286.383	29.7536	43.3319	-3.26681	-2.72444	0.542365	hypothetical protein SS1G_05876
SS1G_05917	1276	27	149	392	5.6781	36.4808	96.9874	2.68366	4.09432	1.41066	hypothetical protein SS1G_05917
SS1G_05918	1608	25	31	62	4.172	6.02289	12.1727	0.529716	1.54483	1.01512	hypothetical protein SS1G_05918
SS1G_05947	1146	35	3	7	8.19546	0.817835	1.92838	-3.32494	-2.08743	1.23751	predicted protein
SS1G_05972	318	390	61	29	329.1	59.9283	28.7906	-2.45722	-3.51486	-1.05764	hypothetical protein SS1G_05972
SS1G_05999	573	38	6	4	17.7959	3.27134	2.20387	-2.44359	-3.01343	-0.569845	hypothetical protein SS1G_05999
SS1G_06002	752	1028	212	204	366.83	88.0739	85.6431	-2.05833	-2.09871	-0.0403776	hypothetical protein SS1G_06002
SS1G_06164	723	10	32	31	3.71152	13.8274	13.5364	1.89745	1.86676	-0.0306862	hypothetical protein SS1G_06164
SS1G_06205	1463	60	11	29	11.0052	2.34897	6.25797	-2.22808	-0.814416	1.41367	predicted protein
SS1G_06213	263	25	27	90	25.5079	32.0728	108.036	0.330408	2.08249	1.75208	predicted protein
SS1G_06224	999	68	99	180	18.2656	30.9598	56.8836	0.76127	1.63888	0.877614	hypothetical protein SS1G_06224
SS1G_06290	1959	461	169	137	63.1476	26.9514	22.0783	-1.22837	-1.5161	-0.28773	hypothetical protein SS1G_06290
SS1G_06320	576	4	30	15	1.86349	16.2715	8.22145	3.12627	2.14138	-0.984882	predicted protein
SS1G_06337	512	214	74	48	112.159	45.1534	29.5972	-1.31264	-1.92201	-0.609373	predicted protein
SS1G_06339	524	370	1486	707	189.479	885.965	425.959	2.22521	1.16868	-1.05653	predicted protein
SS1G_06361	2616	231	64	72	23.6954	7.64313	8.6891	-1.63237	-1.44733	0.185043	hypothetical protein SS1G_06361
SS1G_06390	578	15	0	6	6.96392	0.001	3.2772	-12.7657	-1.08743	11.6782	predicted protein
SS1G_06426	2939	180	503	328	16.4347	53.4684	35.2334	1.70194	1.10019	-0.601745	hypothetical protein SS1G_06426
SS1G_06531	255	41	8	16	43.1453	9.80119	19.8089	-2.13818	-1.12306	1.01512	predicted protein
SS1G_06581	915	52	60	20	15.2501	20.4861	6.90063	0.425827	-1.14402	-1.56984	predicted protein
SS1G_06590	1152	98	174	325	22.8278	47.1874	89.0657	1.04761	1.96408	0.91647	hypothetical protein SS1G_06590
SS1G_06791	741	43	8	16	15.5719	3.37288	6.81682	-2.20689	-1.19177	1.01512	predicted protein
SS1G_06843	1323	70	162	184	14.198	38.2546	43.9074	1.42994	1.62877	0.198829	hypothetical protein SS1G_06843
SS1G_06853	651	319	93	184	131.492	44.6304	89.2312	-1.55888	-0.559357	0.999521	predicted protein
SS1G_06871	549	81	1997	2549	39.5916	1136.41	1465.81	4.84314	5.21036	0.367215	hypothetical protein SS1G_06871
SS1G_06872	638	2	9	20	0.8412	4.40708	9.89667	2.3893	3.55642	1.16712	predicted protein
SS1G_06909	183	95	265	72	139.304	452.401	124.211	1.69937	-0.165437	-1.86481	predicted protein
SS1G_06917	1365	94	32	24	18.4793	7.32397	5.55084	-1.33521	-1.73513	-0.39992	hypothetical protein SS1G_06917
SS1G_06920	1244	33	143	91	7.11842	35.9124	23.0941	2.33485	1.69789	-0.636959	hypothetical protein SS1G_06920
SS1G_06942	1741	259	183	68	39.9201	32.8383	12.3308	-0.281732	-1.69485	-1.41312	predicted protein
SS1G_07025	392	56	4	1	38.3347	3.18789	0.805367	-3.58798	-5.57286	-1.98488	predicted protein
SS1G_07027	710	1465	866	334	553.693	381.056	148.514	-0.539085	-1.89849	-1.3594	hypothetical protein SS1G_07027
SS1G_07056	177	23	33	93	34.8694	58.2465	165.878	0.740208	2.25009	1.50988	hypothetical protein SS1G_07056
SS1G_07057	390	13	39	105	8.94476	31.2413	84.9972	1.80434	3.2483	1.44396	predicted protein
SS1G_07157	386	34	22	3	23.6364	17.8059	2.45366	-0.408655	-3.26801	-2.85935	predicted protein
SS1G_07158	1047	263	235	67	67.4061	70.1213	20.2026	0.0569743	-1.73834	-1.79531	hypothetical protein SS1G_07158
SS1G_07159	867	32	8	1	9.90424	2.8827	0.364134	-1.78062	-4.76551	-2.98488	predicted protein
SS1G_07183	839	102	148	248	32.6233	55.1098	93.3189	0.756404	1.51626	0.75986	hypothetical protein SS1G_07183
SS1G_07224	1029	53	18	7	13.8214	5.46495	2.14764	-1.33862	-2.68607	-1.34745	predicted protein
SS1G_07227	363	23	74	79	17.0024	63.6875	68.7069	1.90527	2.01471	0.109445	hypothetical protein SS1G_07227
SS1G_07356	1510	78	13	34	13.8614	2.68965	7.10856	-2.36559	-0.963446	1.40214	predicted protein
SS1G_07359	3414	422	198	877	33.1695	18.1189	81.0991	-0.872366	1.28983	2.16219	predicted protein
SS1G_07366	459	3	10	25	1.75388	6.80638	17.1952	1.95634	3.29339	1.33705	predicted protein
SS1G_07390	1686	36	19	7	5.72974	3.52067	1.31075	-0.702621	-2.12808	-1.42546	predicted protein
SS1G_07404	1312	54	9	16	11.0446	2.14308	3.85005	-2.36559	-1.52039	0.845193	predicted protein
SS1G_07429	1678	517	392	112	82.6778	72.9832	21.072	-0.179934	-1.97217	-1.79224	hypothetical protein sscle_06g049280
SS1G_07431	623	39	53	18	16.7984	26.5777	9.12146	0.661895	-0.880983	-1.54288	predicted protein
SS1G_07446	1794	28	20	64	4.18818	3.48286	11.2626	-0.266051	1.42714	1.69319	hypothetical protein SS1G_07446
SS1G_07448	204	47	10	26	61.8241	15.3144	40.2368	-2.01328	-0.619655	1.39363	predicted protein
SS1G_07457	1429	14	0	7	2.62897	0.001	1.54648	-11.3603	-0.765506	10.5948	predicted protein
SS1G_07502	2785	19	115	76	1.83071	12.9004	8.61526	2.81694	2.23449	-0.582445	hypothetical protein SS1G_07502
SS1G_07533	1076	71	47	175	17.7066	13.6463	51.3459	-0.375782	1.53596	1.91174	predicted protein
SS1G_07550	920	31	4	2	9.04199	1.35832	0.686313	-2.73482	-3.7197	-0.984882	predicted protein
SS1G_07555	348	11	134	229	8.4821	120.297	207.748	3.82603	4.61427	0.788232	predicted protein
SS1G_07571	1580	7	4	24	1.18886	0.790919	4.7955	-0.587979	2.0121	2.60008	predicted protein
SS1G_07611	288	15	48	27	13.9762	52.0688	29.5972	1.89745	1.08249	-0.814957	hypothetical protein SS1G_07611
SS1G_07629	813	171	24	81	56.4411	9.22252	31.4539	-2.61351	-0.843509	1.77001	hypothetical protein SS1G_07629
SS1G_07660	2916	6	20	42	0.552146	2.14275	4.54717	1.95634	3.04185	1.08551	predicted protein
SS1G_07667	1931	2612	787	3228	362.979	127.327	527.753	-1.51134	0.53998	2.05132	predicted protein
SS1G_07701	336	27	67	73	21.5633	62.2966	68.5904	1.53058	1.66943	0.138853	predicted protein
SS1G_07723	894	56	201	78	16.809	70.2405	27.5446	2.06307	0.712541	-1.35053	predicted protein
SS1G_07760	214	3	21	14	3.76182	30.6573	20.6535	3.02673	2.45689	-0.569845	hypothetical protein SS1G_07760
SS1G_07780	672	11	146	98	4.39252	67.8754	46.0401	3.94977	3.38977	-0.559997	hypothetical protein SS1G_07780
SS1G_07802	1071	138	38	166	34.5764	11.0847	48.9326	-1.64122	0.501009	2.14223	predicted protein
SS1G_07816	159	28	13	95	47.2554	25.5432	188.628	-0.887539	1.99699	2.88453	predicted protein
SS1G_07858	954	22	48	55	6.1882	15.7189	18.201	1.34491	1.55642	0.211515	predicted protein
SS1G_07962	864	7	19	26	2.17407	6.87019	9.50035	1.65995	2.12758	0.46763	hypothetical protein SS1G_07962
SS1G_07975	1211	1	4	39	0.221588	1.03192	10.1672	2.21938	5.5199	3.30052	predicted protein
SS1G_08027	813	17	43	31	5.61111	16.5237	12.0379	1.55818	1.10123	-0.456951	hypothetical protein SS1G_08027
SS1G_08030	2291	28	11	2	3.27962	1.50002	0.275603	-1.12855	-3.57286	-2.44431	predicted protein
SS1G_08086	3421	19	27	51	1.49036	2.4657	4.70649	0.726336	1.65899	0.932655	predicted protein
SS1G_08089	1342	93	117	270	18.596	27.2372	63.5172	0.550582	1.77215	1.22157	hypothetical protein SS1G_08089
SS1G_08163	393	43	12	6	29.3607	9.53933	4.81991	-1.62193	-2.60681	-0.984882	hypothetical protein SS1G_08163
SS1G_08321	195	33	9	5	45.4119	14.4191	8.09497	-1.65509	-2.48797	-0.832879	hypothetical protein sscle_10g076270
SS1G_08384	1868	502	53	63	72.1136	8.86396	10.6474	-3.02425	-2.75977	0.264477	predicted protein
SS1G_08385	713	2	24	12	0.752715	10.516	5.31339	3.80434	2.81946	-0.984882	predicted protein
SS1G_08397	807	2	23	9	0.665038	8.90396	3.52086	3.74294	2.40442	-1.33852	hypothetical protein SS1G_08397
SS1G_08416	2268	36	122	82	4.25941	16.8053	11.4143	1.98019	1.42212	-0.558068	hypothetical protein SS1G_08416
SS1G_08422	4329	5	0	18	0.309936	0.001	1.3127	-8.27583	2.08249	10.3583	predicted protein
SS1G_08548	1142	14	38	19	3.28967	10.3955	5.25252	1.65995	0.675066	-0.984882	hypothetical protein SS1G_08548
SS1G_08550	270	70	98	514	69.5704	113.394	601.006	0.704803	3.11084	2.40603	hypothetical protein SS1G_08550
SS1G_08551	355	120	234	997	90.7075	205.929	886.639	1.18285	3.28905	2.1062	predicted protein
SS1G_08566	666	316	29	22	127.322	13.6036	10.4287	-3.22642	-3.60986	-0.383432	hypothetical protein SS1G_08566
SS1G_08595	1121	46	26	75	11.0114	7.24597	21.122	-0.603746	0.939751	1.5435	hypothetical protein SS1G_08595
SS1G_08640	1092	11	30	39	2.70309	8.58277	11.2751	1.66684	2.06046	0.393629	hypothetical protein SS1G_08640
SS1G_08668	189	13	38	32	18.4574	62.8132	53.4525	1.76686	1.53405	-0.23281	hypothetical protein SS1G_08668
SS1G_08708	827	3	19	18	0.973433	7.17756	6.87142	2.88234	2.81946	-0.062885	predicted protein
SS1G_08709	662	4	8	20	1.62141	3.77538	9.53788	1.21938	2.55642	1.33705	hypothetical protein SS1G_08709
SS1G_08725	696	42	14	45	16.1931	6.28417	20.4119	-1.36559	0.33403	1.69962	predicted protein
SS1G_08805	321	21	57	43	17.5551	55.4752	42.2905	1.65995	1.26844	-0.391508	hypothetical protein SS1G_08805
SS1G_08834	864	21	0	7	6.52222	0.001	2.55779	-12.6711	-1.35047	11.3207	predicted protein
SS1G_08874	90	28	0	4	83.4845	0.001	14.0313	-16.3492	-2.57286	13.7764	predicted protein
SS1G_08913	1215	36	4	12	7.9509	1.02852	3.11806	-2.95055	-1.35047	1.60008	predicted protein
SS1G_09014	216	49	0	6	60.8741	0.001	8.76955	-15.8935	-2.79525	13.0983	predicted protein
SS1G_09080	490	236	64	171	129.243	40.805	110.174	-1.66327	-0.230297	1.43297	predicted protein
SS1G_09168	582	371	220	53	171.057	118.094	28.7497	-0.534539	-2.57286	-2.03832	hypothetical protein SS1G_09168
SS1G_09231	2984	18	29	58	1.61869	3.03618	6.13633	0.907432	1.92255	1.01512	predicted protein
SS1G_09256	1347	72	7	29	14.3435	1.62353	6.79689	-3.14319	-1.07745	2.06574	predicted protein
SS1G_09381	824	8	3	22	2.60527	1.13743	8.42898	-1.19566	1.69393	2.88959	predicted protein
SS1G_09413	1393	4	6	20	0.770547	1.34564	4.53272	0.804339	2.55642	1.75208	predicted protein
SS1G_09457	937	2	19	18	0.57277	6.33495	6.06475	3.4673	3.40442	-0.062885	predicted protein
SS1G_09618	850	3	31	47	0.947093	11.3939	17.4566	3.58861	4.20412	0.61551	predicted protein
SS1G_09619	1230	13	101	122	2.83614	25.6534	31.3137	3.17715	3.46479	0.287643	predicted protein
SS1G_09635	2770	122	60	215	11.8187	6.76707	24.5041	-0.80447	1.05195	1.85642	hypothetical protein SS1G_09635
SS1G_09650	2353	54	31	10	6.15832	4.11594	1.34171	-0.581315	-2.19847	-1.61715	predicted protein
SS1G_09688	1195	19	52	103	4.26654	13.5945	27.2113	1.67189	2.67307	1.00118	predicted protein
SS1G_09757	252	163	920	600	173.571	1140.56	751.676	2.71614	2.11458	-0.601554	hypothetical protein SS1G_09757
SS1G_09768	252	52	153	104	55.3723	189.679	130.29	1.77632	1.23449	-0.541831	predicted protein
SS1G_09799	408	134	1160	1189	88.1322	888.233	920.029	3.3332	3.38394	0.0507414	predicted protein
SS1G_09836	2736	11	12	36	1.07886	1.37023	4.154	0.344907	1.94499	1.60008	hypothetical protein SS1G_09836
SS1G_09845	283	48	122	113	45.514	134.68	126.058	1.56515	1.46971	-0.0954408	predicted protein
SS1G_09853	1023	24	3	19	6.29543	0.916167	5.86351	-2.78062	-0.102541	2.67808	predicted protein
SS1G_09882	522	34	61	99	17.4783	36.508	59.8749	1.06265	1.77639	0.713737	hypothetical protein SS1G_09882
SS1G_09975	983	114	298	271	31.1201	94.7091	87.0353	1.60565	1.48375	-0.121902	hypothetical protein SS1G_09975
SS1G_09984	1796	16	31	43	2.39058	5.39243	7.55861	1.17357	1.66076	0.487186	predicted protein
SS1G_09996	1086	28	2	9	6.9186	0.575346	2.61633	-3.58798	-1.40294	2.18504	predicted protein
SS1G_10005	381	51	8	12	35.9199	6.55985	9.94343	-2.45305	-1.85297	0.60008	predicted protein
SS1G_10110	1891	15	0	7	2.12858	0.001	1.16866	-11.0557	-0.865042	10.1906	predicted protein
SS1G_10147	2618	38	4	29	3.89497	0.477331	3.4971	-3.02855	-0.155453	2.8731	hypothetical protein sscle_16g108030
SS1G_10198	779	245	58	140	84.3954	23.2605	56.7375	-1.85928	-0.572861	1.28642	predicted protein
SS1G_10259	1446	16	18	43	2.96922	3.88896	9.38815	0.389301	1.66076	1.27146	hypothetical protein SS1G_10259
SS1G_10266	2745	36	3	10	3.51925	0.341435	1.1501	-3.36559	-1.6135	1.75208	predicted protein
SS1G_10285	374	12	26	41	8.60993	21.7185	34.6092	1.33485	2.00708	0.67223	predicted protein
SS1G_10321	261	61	34	12	62.7162	40.6975	14.5151	-0.623898	-2.11128	-1.48738	hypothetical protein SS1G_10321
SS1G_10331	860	840	481	155	262.102	174.733	56.9001	-0.584976	-2.20363	-1.61865	predicted protein
SS1G_10332	601	343	49	61	153.147	25.4713	32.0431	-2.58798	-2.25683	0.331145	predicted protein
SS1G_10370	1063	44	273	389	11.1073	80.234	115.53	2.8527	3.37869	0.525987	hypothetical protein SS1G_10370
SS1G_10439	419	2	1	32	1.28087	0.745616	24.111	-0.780624	4.23449	5.01512	predicted protein
SS1G_10446	770	332	75	103	115.701	30.4298	42.2305	-1.92684	-1.45405	0.472799	hypothetical protein SS1G_10446
SS1G_10454	625	28	47	12	12.0218	23.4935	6.06151	0.96661	-0.987899	-1.95451	predicted protein
SS1G_10457	1676	158	104	40	25.2972	19.386	7.5347	-0.383965	-1.74736	-1.36339	hypothetical protein SS1G_10457
SS1G_10479	488	0	12	18	0.001	7.68228	11.6448	12.9073	13.5074	0.60008	hypothetical protein SS1G_10479
SS1G_10514	318	77	22	40	64.9761	21.6135	39.7112	-1.58798	-0.710365	0.877614	predicted protein
SS1G_10561	636	212	1692	1641	89.4476	831.136	814.575	3.21597	3.18693	-0.0290368	hypothetical protein SS1G_10561
SS1G_10589	399	22	4	2	14.7958	3.13196	1.58248	-2.24006	-3.22494	-0.984882	hypothetical protein SS1G_10589
SS1G_10613	610	49	17	14	21.5554	8.70659	7.24566	-1.30787	-1.57286	-0.26499	predicted protein
SS1G_10734	902	85	44	24	25.2873	15.2397	8.4001	-0.730583	-1.58993	-0.859352	hypothetical protein sscle_09g070270
SS1G_10746	1174	49	30	96	11.2	7.98329	25.8156	-0.488443	1.20475	1.69319	hypothetical protein SS1G_10746
SS1G_10805	480	41	94	110	22.921	61.1809	72.3488	1.41641	1.6583	0.241888	hypothetical protein SS1G_10805
SS1G_10827	720	35	29	89	13.0444	12.5833	39.0245	-0.0519257	1.58094	1.63287	predicted protein
SS1G_10843	852	172	89	49	54.1725	32.6347	18.1567	-0.731155	-1.57706	-0.845906	predicted protein
SS1G_10861	821	9	28	32	2.94164	10.6548	12.3051	1.85681	2.06457	0.207763	predicted protein
SS1G_10865	1938	58	250	163	8.0309	40.3009	26.553	2.32718	1.72524	-0.601939	hypothetical protein SS1G_10865
SS1G_10901	2043	10	20	30	1.31347	3.05837	4.63589	1.21938	1.81946	0.60008	predicted protein
SS1G_10902	1266	102	170	265	21.62	41.9512	66.0833	0.956342	1.61192	0.655575	hypothetical protein
SS1G_10903	1591	150	178	483	25.2995	34.9525	95.8422	0.466291	1.92155	1.45526	predicted protein
SS1G_10905	147	79	182	363	144.211	386.797	779.595	1.42339	2.43454	1.01115	predicted protein
SS1G_10907	1167	15	11	39	3.44914	2.94477	10.5505	-0.228083	1.61301	1.84109	predicted protein
SS1G_10910	1335	171	190	66	34.372	44.4633	15.6078	0.371379	-1.13896	-1.51034	hypothetical protein SS1G_10910
SS1G_10911	798	481	325	111	161.746	127.236	43.9137	-0.346221	-1.88098	-1.53476	predicted protein
SS1G_10924	353	46	11	14	34.9682	9.73525	12.5208	-1.84475	-1.48171	0.363041	predicted protein
SS1G_10982	894	70	17	36	21.0112	5.94074	12.7129	-1.82244	-0.724864	1.09758	hypothetical protein SS1G_10982
SS1G_10996	1464	46	74	130	8.43154	15.7914	28.0338	0.905268	1.7333	0.828032	hypothetical protein SS1G_10996
SS1G_11080	975	33	9	38	9.08238	2.88381	12.3044	-1.65509	0.438027	2.09312	predicted protein
SS1G_11105	402	25	59	11	16.688	45.8516	8.63866	1.45816	-0.949931	-2.40809	predicted protein
SS1G_11120	1184	39	103	90	8.839	27.1778	23.9978	1.62047	1.44094	-0.17953	predicted protein
SS1G_11171	616	29	27	91	12.633	13.6934	46.6381	0.116283	1.88431	1.76802	predicted protein
SS1G_11197	1258	28	5	19	5.97266	1.2417	4.76818	-2.26605	-0.324934	1.94112	predicted protein
SS1G_11202	2761	126	75	228	12.246	8.48641	26.0704	-0.529085	1.0901	1.61919	predicted protein
SS1G_11260	2003	2	20	7	0.267941	3.11945	1.10331	3.5413	2.04185	-1.49946	hypothetical protein SS1G_11260
SS1G_11274	546	25	3	10	12.2868	1.71655	5.78212	-2.83952	-1.08743	1.75208	predicted protein
SS1G_11281	548	56	2141	1920	27.4219	1220.58	1106.12	5.47609	5.33403	-0.142061	hypothetical protein sscle_12g087010
SS1G_11368	909	5	23	16	1.47603	7.90484	5.55694	2.42101	1.91257	-0.508444	predicted protein
SS1G_11413	765	580	1003	243	203.45	409.608	100.282	1.00957	-1.0206	-2.03018	hypothetical protein SS1G_11413
SS1G_11423	183	17	2	31	24.928	3.41435	53.4799	-2.86809	1.10123	3.96931	predicted protein
SS1G_11523	240	11	27	33	12.2991	35.1465	43.4093	1.51483	1.81946	0.304624	predicted protein
SS1G_11528	1527	52	8	11	9.13807	1.63674	2.27423	-2.48106	-2.00651	0.474549	predicted protein
SS1G_11545	525	38	5	6	19.4229	2.97536	3.60804	-2.70662	-2.42847	0.278152	hypothetical protein SS1G_11545
SS1G_11568	1000	46	7	10	12.3438	2.18689	3.15704	-2.49683	-1.96714	0.529691	predicted protein
SS1G_11596	2822	574	1146	1382	54.5814	126.869	154.608	1.21686	1.50213	0.285268	predicted protein
SS1G_11634	851	25	2	5	7.88316	0.734225	1.8549	-3.42448	-2.08743	1.33705	predicted protein
SS1G_11660	428	35	12	53	21.9439	8.75924	39.0942	-1.32494	0.833131	2.15808	predicted protein
SS1G_11673	506	26	13	48	13.7884	8.02642	29.9482	-0.780624	1.11902	1.89964	predicted protein
SS1G_11691	2028	13	57	67	1.72015	8.78084	10.4301	2.35183	2.60014	0.248317	predicted protein
SS1G_11802	659	48	19	55	19.5455	9.00735	26.3486	-1.11766	0.430891	1.54855	hypothetical protein SS1G_11802
SS1G_11870	1236	642	281	150	139.382	71.0259	38.3136	-0.972627	-1.86312	-0.89049	predicted protein
SS1G_11872	354	1302	195	248	986.956	172.092	221.171	-2.51981	-2.15782	0.361984	predicted protein
SS1G_11917	1194	18	3	1	4.04537	0.784957	0.264409	-2.36559	-3.93543	-1.56984	predicted protein
SS1G_11957	2669	58	4	13	5.83136	0.46821	1.53771	-3.6386	-1.92305	1.71556	hypothetical protein SS1G_11957
SS1G_12093	1388	279	396	731	53.9392	89.1322	166.268	0.724612	1.6241	0.899489	hypothetical protein SS1G_12093
SS1G_12124	1878	39	61	18	5.57262	10.1476	3.02592	0.864711	-0.880983	-1.74569	predicted protein
SS1G_12188	897	9	50	73	2.6924	17.4143	25.6927	2.69331	3.25439	0.561086	predicted protein
SS1G_12195	1280	23	60	60	4.82179	14.6444	14.7986	1.6027	1.61782	0.0151175	hypothetical protein SS1G_12195
SS1G_12264	2443	52	17	92	5.71176	2.17397	11.889	-1.3936	1.05762	2.45122	predicted protein
SS1G_12286	806	0	14	8	0.001	5.42653	3.13354	12.4058	11.6136	-0.792237	predicted protein
SS1G_12287	1021	48	34	130	12.6155	10.4036	40.1973	-0.278123	1.6719	1.95002	predicted protein
SS1G_12291	675	168	28	175	66.7876	12.9594	81.8491	-2.36559	0.293388	2.65897	hypothetical protein SS1G_12291
SS1G_12296	2637	41	6	25	4.17219	0.710837	2.99302	-2.55321	-0.479202	2.07401	predicted protein
SS1G_12469	512	28	4	7	14.675	2.44073	4.31626	-2.58798	-1.76551	0.822472	---NA---
SS1G_12471	1791	107	137	374	16.0317	23.8976	65.9259	0.575941	2.03992	1.46398	hypothetical protein SS1G_12471
SS1G_12531	1820	36	5	12	5.30788	0.858277	2.08156	-2.62862	-1.35047	1.27815	predicted protein
SS1G_12554	568	2	19	16	0.944869	10.4504	8.89306	3.4673	3.23449	-0.23281	predicted protein
SS1G_12593	1230	7	19	32	1.52715	4.82589	8.21343	1.65995	2.42714	0.76719	predicted protein
SS1G_12595	538	47	13	47	23.4426	7.54901	27.5801	-1.63477	0.234494	1.86927	predicted protein
SS1G_12597	1164	20	2	2	4.6107	0.536792	0.542446	-3.10255	-3.08743	0.0151175	predicted protein
SS1G_12608	758	56	53	185	19.8248	21.8442	77.0517	0.139942	1.95852	1.81858	hypothetical protein SS1G_12608
SS1G_12610	1693	3	28	13	0.475504	5.1669	2.42419	3.44177	2.34997	-1.0918	predicted protein
SS1G_12734	156	681	170	330	1171.42	340.45	667.835	-1.78274	-0.810695	0.972049	hypothetical protein SS1G_12734
SS1G_12761	4978	41	54	7	2.21014	3.38897	0.443939	0.616712	-2.3157	-2.93242	predicted protein
SS1G_12778	282	18	23	44	17.1283	25.4805	49.2587	0.573013	1.524	0.950987	hypothetical protein SS1G_12778
SS1G_12784	1445	36	8	25	6.68536	1.72962	5.462	-1.95055	-0.291575	1.65897	predicted protein
SS1G_12791	1702	24	36	60	3.78392	6.60803	11.1294	0.804339	1.55642	0.752083	hypothetical protein SS1G_12791
SS1G_12822	999	149	212	388	40.0231	66.2978	122.616	0.728128	1.61524	0.88711	hypothetical protein SS1G_12822
SS1G_12825	594	207	70	25	93.5134	36.8163	13.2872	-1.34483	-2.81514	-1.47031	hypothetical protein SS1G_12825
SS1G_12826	674	110	76	21	43.7948	35.2276	9.83647	-0.314056	-2.15455	-1.84049	hypothetical protein SS1G_12826
SS1G_13013	464	32	15	108	18.5064	10.0996	73.4828	-0.873733	1.98938	2.86311	predicted protein
SS1G_13029	1228	8	22	34	1.74816	5.59697	8.74098	1.67881	2.32196	0.643149	predicted protein
SS1G_13035	662	74	3	10	29.996	1.41577	4.76894	-4.40511	-2.65303	1.75208	predicted protein
SS1G_13124	307	14132	1461	2273	12352.5	1486.76	2337.44	-3.05456	-2.4018	0.652759	predicted protein
SS1G_13131	510	391	1856	4603	205.73	1136.94	2849.38	2.46633	3.79183	1.3255	pectin
SS1G_13156	1168	1024	231	238	235.26	61.7871	64.3301	-1.92887	-1.87069	0.0581863	hypothetical protein SS1G_13156
SS1G_13201	183	8	20	29	11.7308	34.1435	50.0296	1.5413	2.09247	0.55117	predicted protein
SS1G_13277	1038	110	15	10	28.4371	4.51464	3.04146	-2.65509	-3.22494	-0.569845	hypothetical protein SS1G_13277
SS1G_13298	534	70	19	28	35.176	11.1158	16.5538	-1.66198	-1.08743	0.574545	hypothetical protein sscle_03g031310
SS1G_13299	2308	48	12	24	5.58079	1.62433	3.28288	-1.78062	-0.765506	1.01512	hypothetical protein sscle_03g031320
SS1G_13341	1144	638	231	161	149.653	63.0834	44.4303	-1.24629	-1.752	-0.505715	hypothetical protein SS1G_13341
SS1G_13343	278	20	0	3	19.3052	0.001	3.40688	-14.2367	-2.50247	11.7342	predicted protein
SS1G_13356	162	348	951	605	576.44	1833.98	1179.02	1.66973	1.03234	-0.637393	predicted protein
SS1G_13431	1022	79	15	63	20.7427	4.58532	19.4612	-2.17751	-0.092007	2.08551	hypothetical protein SS1G_13431
SS1G_13479	654	34	6	5	13.9505	2.86617	2.41364	-2.28312	-2.53104	-0.247917	predicted protein
SS1G_13480	1110	418	123	156	101.052	34.6187	44.3692	-1.54547	-1.18746	0.358005	predicted protein
SS1G_13481	719	50	106	121	18.6608	46.0581	53.1296	1.30344	1.5095	0.20606	hypothetical protein SS1G_13481
SS1G_13505	511	28	20	72	14.7037	12.2275	44.4827	-0.266051	1.59706	1.86311	predicted protein
SS1G_13516	900	113	129	316	33.6919	44.7792	110.847	0.410425	1.7181	1.30767	predicted protein
SS1G_13523	312	231	54	115	198.677	54.0715	116.365	-1.87749	-0.771765	1.10572	hypothetical protein SS1G_13523
SS1G_13540	923	4	4	23	1.16292	1.3539	7.86694	0.219376	2.75806	2.53868	predicted protein
SS1G_13546	321	75	119	14	62.6969	115.817	13.769	0.885375	-2.18697	-3.07235	predicted protein
SS1G_13578	518	608	42	83	314.966	25.3308	50.5857	-3.63623	-2.63839	0.99784	predicted protein
SS1G_13593	451	10	5	38	5.94995	3.46356	26.6003	-0.780624	2.16049	2.94112	predicted protein
SS1G_13682	2485	2	11	22	0.21597	1.38291	2.79496	2.67881	3.69393	1.01512	predicted protein
SS1G_13730	1112	29	35	9	6.99815	9.83314	2.55516	0.490678	-1.45356	-1.94424	predicted protein
SS1G_13732	1584	1473	376	90	249.539	74.1586	17.9377	-1.75058	-3.79819	-2.04762	hypothetical protein SS1G_13732
SS1G_13753	3957	1670	261	212	113.251	20.6065	16.9141	-2.45835	-2.74322	-0.284868	predicted protein
SS1G_13784	1155	78	25	79	18.1219	6.76218	21.5936	-1.42217	0.252872	1.67504	hypothetical protein SS1G_13784
SS1G_13849	2054	238	472	735	31.0933	71.7911	112.971	1.2072	1.86128	0.654075	predicted protein
SS1G_13851	441	230	635	1006	139.952	449.846	720.177	1.6845	2.36342	0.678919	predicted protein
SS1G_13862	365	65	164	109	47.7871	140.372	94.2787	1.55456	0.98031	-0.57425	predicted protein
SS1G_13896	1257	5	2	26	1.06739	0.497077	6.53007	-1.10255	2.61301	3.71556	predicted protein
SS1G_13917	1445	15	42	35	2.78557	9.08051	7.6468	1.7048	1.45689	-0.247917	hypothetical protein SS1G_13917
SS1G_13919	626	134	1673	1306	57.4408	834.931	658.641	3.86151	3.51934	-0.342165	hypothetical protein SS1G_13919
SS1G_13920	1140	2	46	14	0.470777	12.6061	3.87706	4.74294	3.04185	-1.70109	predicted protein
SS1G_13951	527	20	0	6	10.1838	0.001	3.59435	-13.314	-1.50247	11.8115	predicted protein
SS1G_13972	608	110	20	56	48.5489	10.2767	29.078	-2.24006	-0.739511	1.50054	hypothetical protein SS1G_13972
SS1G_13988	753	95	370	279	33.8547	153.51	116.974	2.1809	1.78876	-0.392143	hypothetical protein SS1G_13988
SS1G_14085	1207	46	5	9	10.2268	1.29417	2.35405	-2.98226	-2.11914	0.863114	predicted protein
SS1G_14106	1199	37	48	5	8.28081	12.5069	1.31653	0.594885	-2.65303	-3.24792	predicted protein
SS1G_14109	1816	47	2	3	6.945	0.344067	0.521537	-4.33521	-3.73513	0.60008	predicted protein
SS1G_14133	1034	10186	22213	30167	2643.46	6711.44	9210.67	1.34419	1.80088	0.456685	hypothetical protein SS1G_14133
SS1G_14141	1106	84	18	54	20.3805	5.08448	15.4141	-2.00302	-0.402936	1.60008	hypothetical protein SS1G_14141
SS1G_14189	1217	36	22	65	7.93783	5.64756	16.8617	-0.491117	1.08694	1.57805	predicted protein
SS1G_14207	1841	8	17	39	1.16607	2.88486	6.68791	1.30684	2.5199	1.21306	predicted protein
SS1G_14234	1597	25	79	44	4.20073	15.4544	8.69816	1.8793	1.05007	-0.829232	predicted protein
SS1G_14399	267	21	11	45	21.1056	12.8709	53.2085	-0.71351	1.33403	2.04754	hypothetical protein SS1G_14399
SS1G_14408	1176	43	16	3	9.81186	4.25052	0.805367	-1.20689	-3.60681	-2.39992	predicted protein
SS1G_14413	1805	216	208	695	32.1119	36.001	121.559	0.164929	1.92048	1.75555	hypothetical protein SS1G_14413
SS1G_14473	1431	36	16	46	6.75077	3.49309	10.1484	-0.950549	0.588131	1.53868	predicted protein
SS1G_14480	1171	14	32	66	3.2082	8.53733	17.7937	1.41202	2.47153	1.05951	predicted protein
SS1G_14516	809	26	86	49	8.62412	33.2108	19.1217	1.9452	1.14876	-0.796437	hypothetical protein SS1G_14516
SS1G_14516	809	26	86	49	8.62412	33.2108	19.1217	1.9452	1.14876	-0.796437	hypothetical protein SS1G_14516
